# Supplementary material for: Identification and characterization of Sr13, a tetraploid wheat gene that confers resistance to the Ug99 stem rust race group
Source: PubMed Central journal article supplement — Proc Natl Acad Sci U S A. 2017 Oct 23;114(45):E9483–92. doi: 10.1073/pnas.1706277114 (PMC5692537; doi:10.1073/pnas.1706277114), 2017-10-23
Supplement: pnas.1706277114.sapp.pdf [file pnas.1706277114.sapp.pdf]

## ***Supplementary Information Appendix***

### **Identification and characterization of *Sr13*, a tetraploid wheat gene that confers resistance to the Ug99 stem rust race group**

Wenjun Zhang <sup>1,\*</sup>, Shisheng Chen <sup>1,\*</sup>, Zewdie Abate <sup>1</sup>, Jayaveeramuthu Nirmala <sup>2</sup>, Matthew N. Rouse <sup>2,3†</sup>, and Jorge Dubcovsky <sup>1,4†</sup>

<sup>1</sup> Department of Plant Sciences, University of California, Davis, CA 95616, USA.

<sup>2</sup> Department of Plant Pathology, University of Minnesota, St. Paul, MN 55108, USA

<sup>3</sup> USDA-ARS, Cereal Disease Laboratory, University of Minnesota, St. Paul, MN 55108, USA

<sup>4</sup> Howard Hughes Medical Institute, Chevy Chase, MD 20815 USA

\* W.Z. and S.C. contributed equally to this work.

† ***Corresponding authors:*** Jorge Dubcovsky and Matthew N. Rouse

#### **This file includes:**

*SI Appendix*, Method S1

*SI Appendix*, Figures S1 to S16

*SI Appendix*, Tables S1 to S11

*SI Appendix*, References

## SI Appendix, Methods

### SI Appendix, Method S1. Map-based cloning of *Sr13*

To generate additional markers in the *Sr13* region, we identified the colinear region in the genome of *Brachypodium distachyon* (L.) P. Beauv. (2.9 Mb), identified the genes in this region (*Bradi3g60550* to *Bradi3g56757*, Fig. 1A), and found the closest wheat sequences (Fig. 1B).

Using genome specific primers described in *SI Appendix*, Table S1, we mapped these markers in the 45 lines carrying informative recombination events and delimited the *Sr13* region to a 0.08 cM interval (0.01 cM distal to marker *CJ641478* and 0.07 cM proximal to marker *CJ671993*).

Within this region, we identified a marker completely linked to *Sr13*, that we designated *EX24785*. This marker was developed from transcriptome fragment *EX\_c24785* (Kansas State University wheat transcript assembly <http://129.130.90.211/snp/>), identified using an NLR gene from Chinese Spring chromosome arm 6AL as query in a BLAST search (Fig. 1B).

We used the completely linked marker *EX24785* to screen a bacterial artificial chromosome (BAC) library of the *Sr13*-resistant durum wheat variety Langdon. We identified BAC 156P14 (Fig. 1C), sequenced it, and developed four markers for two complete NLR genes (*CNL1* and *CNL3*) and two NLR pseudogenes (*cnl2* and *cnl4*). Two recombination events were identified between distal marker *CNL1* and *cnl2* and one recombination event between *cnl2* and the linked group of markers *CNL3-cnl4-EX24785-Sr13* (Fig. 1D). We initiated a chromosome walk from both ends that resulted in the identification of nine overlapping BACs covering a region of roughly 955 kb (Fig. 1C). The complete region was sequenced, annotated and deposited in GenBank as accession KY924305.

## SI Appendix, Figures

### Figure S1. *CNL3* and *CNL13* Mutants Inoculated with Races TKTTF, JRCQC and TRTTF.

Kronos: *Sr13*-resistant control, Rusty: susceptible control. *CNL3* mutants T4-403, T4-1065, and T4-3715: resistant to races TKTTF (A) and JRCQC (B). *CNL13* mutants T4-476, T4-771, and T4-3102: susceptible to races TKTTF (A) and JRCQC (B). All mutants were resistant to TRTTF (C), likely due to a second gene in Kronos resistant to this race (see *SI Appendix*, Fig. S2). Numbers below leaves indicate average pustule sizes (n = 3) and superscripts indicate significance of differences with Kronos (ns = not significant, \* =  $P < 0.05$ ). Results for TTKSK are in Fig. 2.

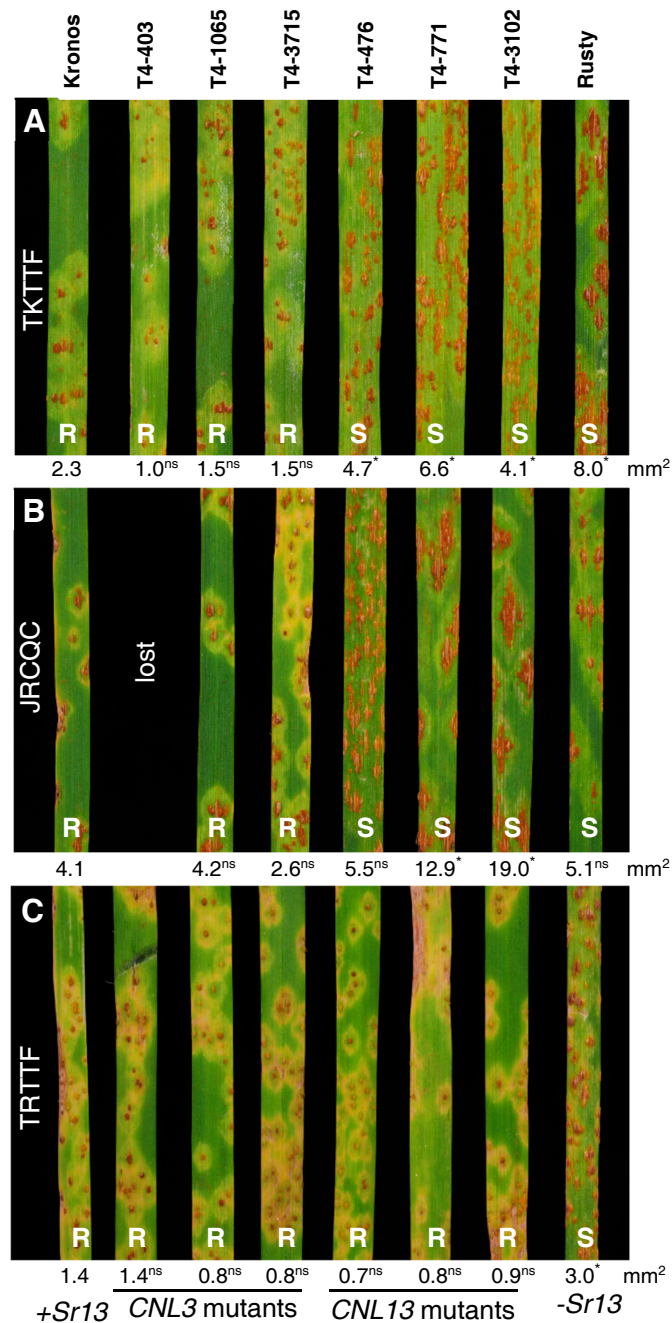

**Figure S2. Kronos × Rusty Plants Segregating for *CNL13*.** 1) Kronos, 2) Rusty, 3-5) homozygous plants for resistant (++) allele, 6-14) homozygous plants for susceptible *CNL13* allele (--). *CNL13* alleles and phenotypes showed perfect co-segregation for races TTKSK (A) and JRCQC (B). However, some plants homozygous for *CNL13* susceptible allele in lanes 7, 9, and 14) showed resistance to race TRTTF (C). This result confirmed the presence of a second resistance gene to race TRTTF in Kronos (suggested by *CNL13* mutants in *SI Appendix*, Fig. S1).

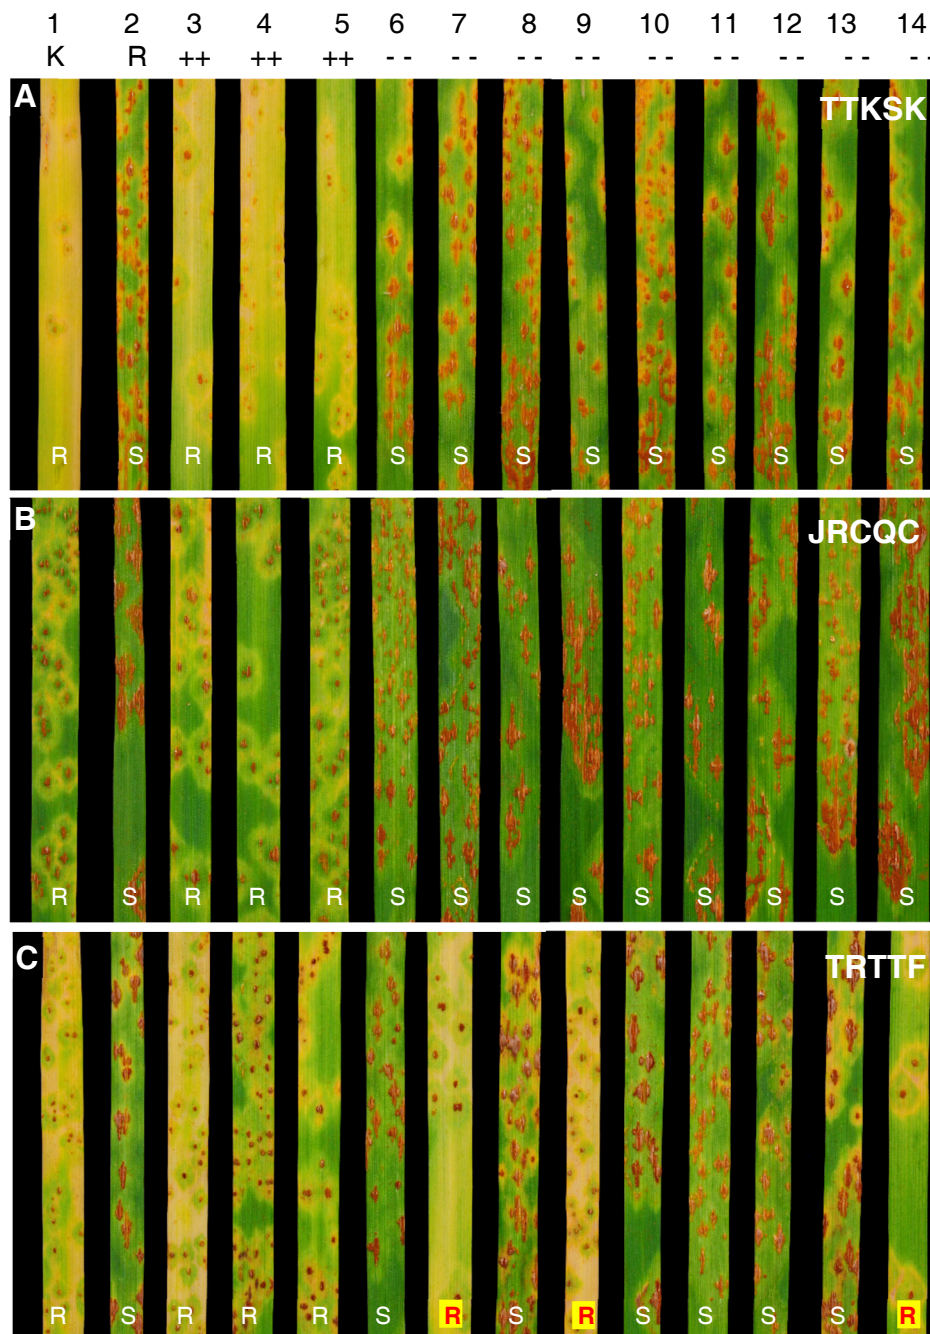

**Figure S3. Induced Mutations in the LRR Domain.** Reaction of four Kronos mutant lines with non-synonymous mutations in the LRR domain. The mutant line T4-771 carrying a premature stop codon in the LRR domain (*SI Appendix*, Fig. S1) was included as a susceptible control. Among these four LRR mutants, T4-4367 (A717V) was the only one susceptible to TTKSK. Numbers below leaves indicate average pustule sizes (n = 3). Different letters indicate significant differences among lines based on Tukey's test ( $P < 0.001$ ).

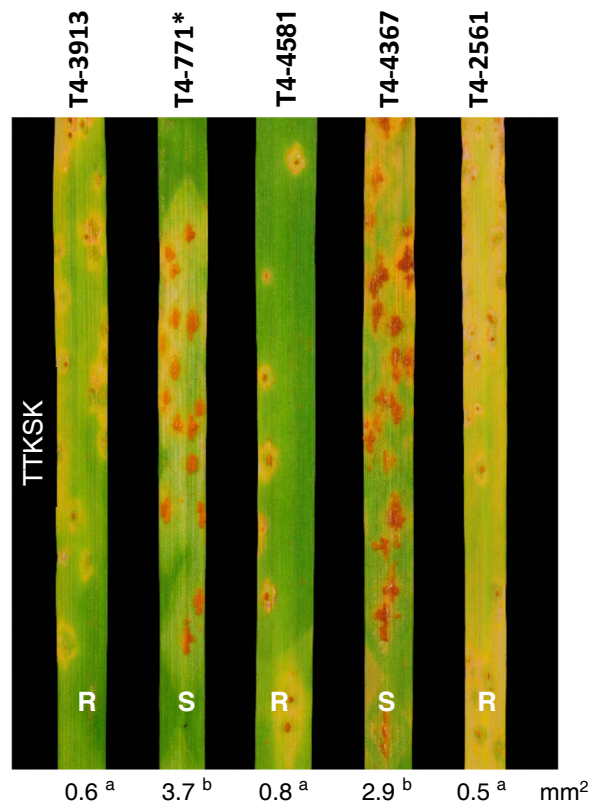



**Figure S4. *CNL13* T<sub>2</sub> Transgenic Plants Inoculated with Races TTKSK, TKTF and TRTF. (A) TTKSK, (B) TKTF, and (C) TRTF. 1) Khapstein/\*9 LMPG (resistant control), 2) Fielder (susceptible control), 3-10) T<sub>2</sub> transgenic plants in a Fielder background, 3-4) T<sub>2</sub>Sr13-1, 5-6) T<sub>2</sub>Sr13-2, 7-8) T<sub>2</sub>Sr13-3, and 9-10) T<sub>2</sub>Sr13-4. All lines are hexaploid. Numbers below leaves indicate average pustule sizes (n = 3) and superscripts indicate significance of differences between transgenic and Fielder (ns = not significant, \*\* =  $P < 0.01$ , \*\*\* =  $P < 0.001$ ).**

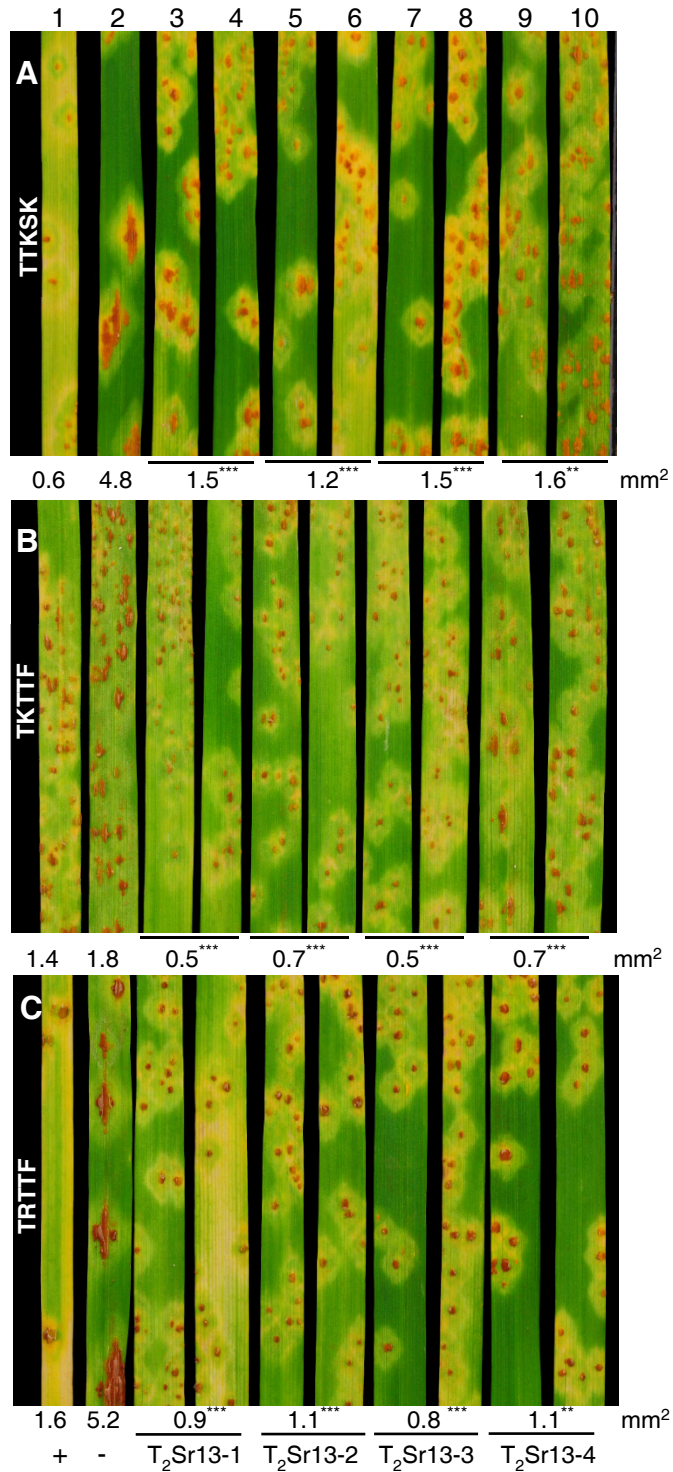

**Figure S5. Reactions to *Puccinia graminis* f. sp. *tritici* Race TTKSK at Two Temperature Regimes (18 °C day / 15 °C night and 25 °C day / 22 °C night).** Both experiments were performed under long-days (16 h light / 8 h dark). 1-2) Hexaploid. 3-4) Tetraploid. 1) LMPG (no *Sr13* = S). 2) Khapstein/9\*LMPG (*Sr13* = R). 3) Rusty (no *Sr13* = S). 4) Kronos (*Sr13* = R). Numbers below the leaves indicate average pustule sizes  $\pm$  their standard error of the means (n = 3). A three-way ANOVA of a larger experiment (n = 8) is presented in (*SI Appendix*, Table S3).

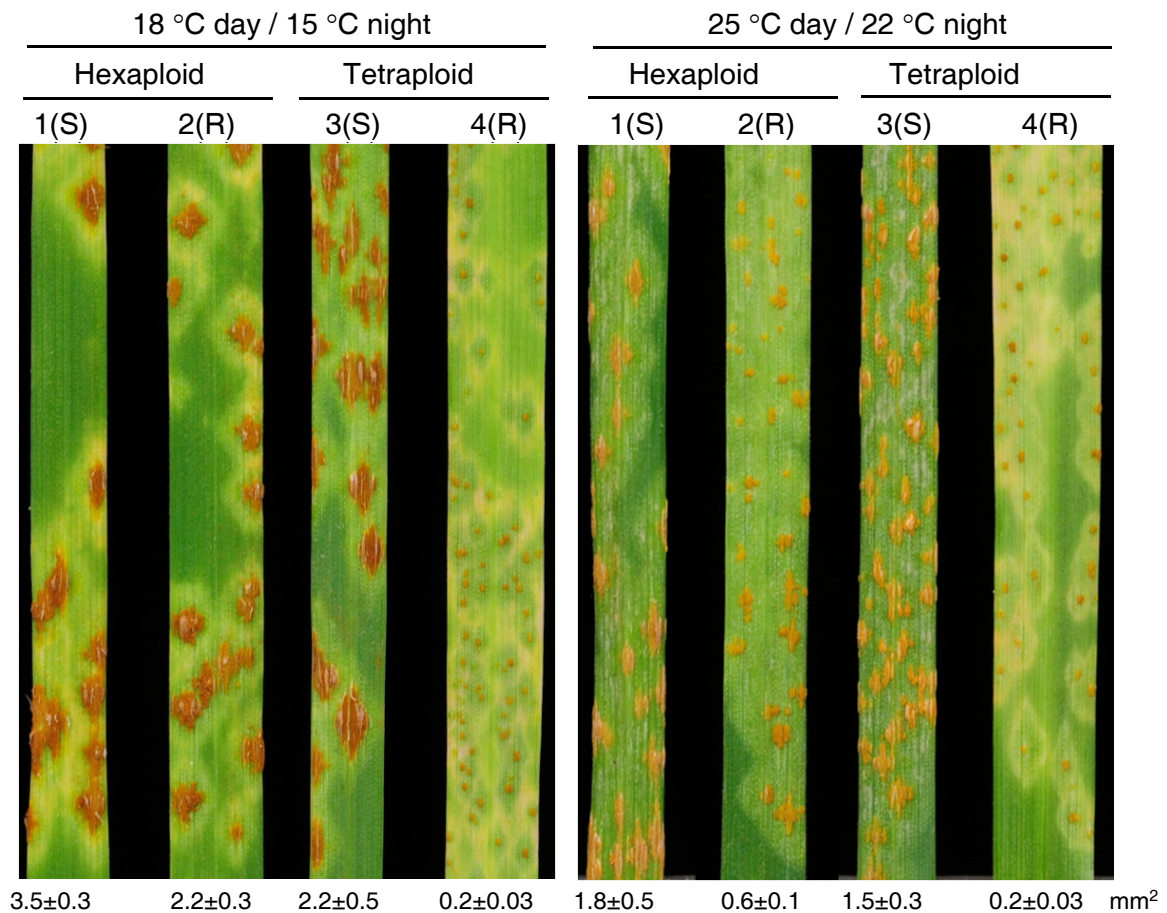

**Figure S6. Effect of *Sr13* on *Pgt* Race BCCBC Growth Five Days post Inoculation (dpi).**

White bars are 2 mm. The average growth area of a single infection was  $1.42 \pm 0.09 \text{ mm}^2$  for LMPG (no *Sr13*) and  $0.42 \pm 0.04 \text{ mm}^2$  for Khapstein/9\*LMPG (LMPG-*Sr13*). The 70.8% decrease in *Pgt* growth area five dpi was highly significant ( $P = 0.0004$ ).  $n = 3$  leaves (10 individual infection areas measured per leaf). Leaves were cleared with KOH (37 °C, 12 h) and stained with WGA-FITC (L4895-10MG; Sigma–Aldrich).

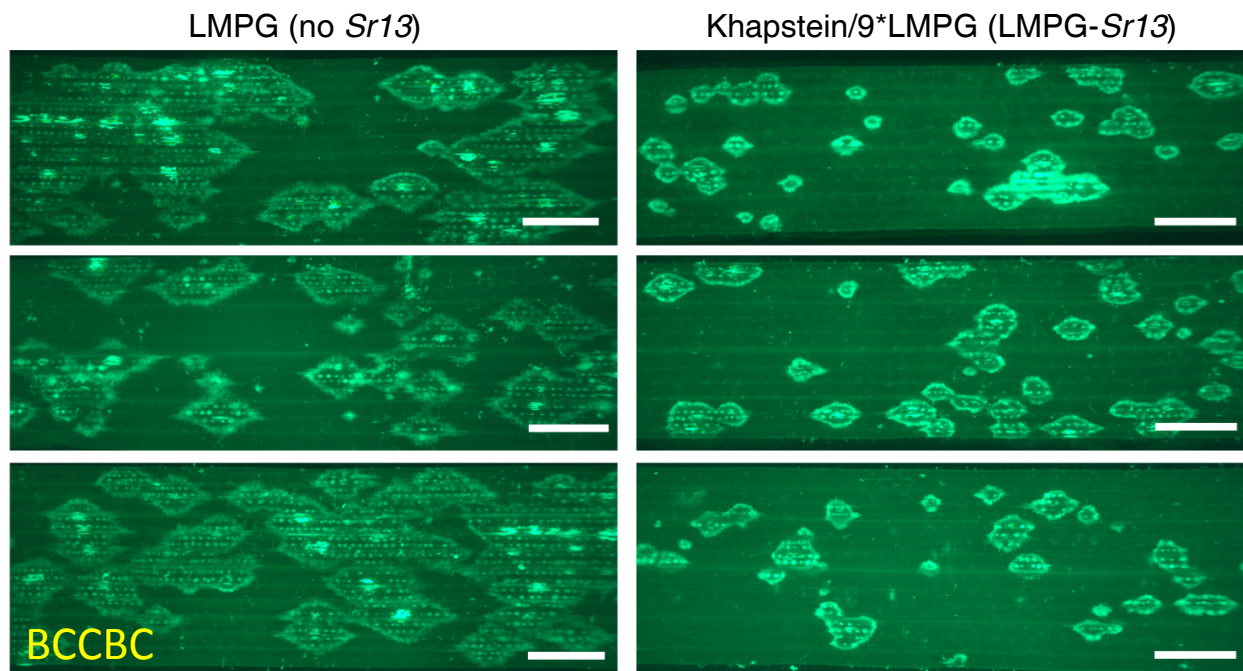



**Figure S7. Effect of Temperature and Inoculation with *Pgt* Race TTKSK on *CNL13* Transcript Levels.** Leaves were collected from Kronos one, two, four and six days post inoculation with TTKSK. Transcript levels were expressed as fold-*ACTIN*. The statistical analysis is presented in *SI Appendix*, Table S5.

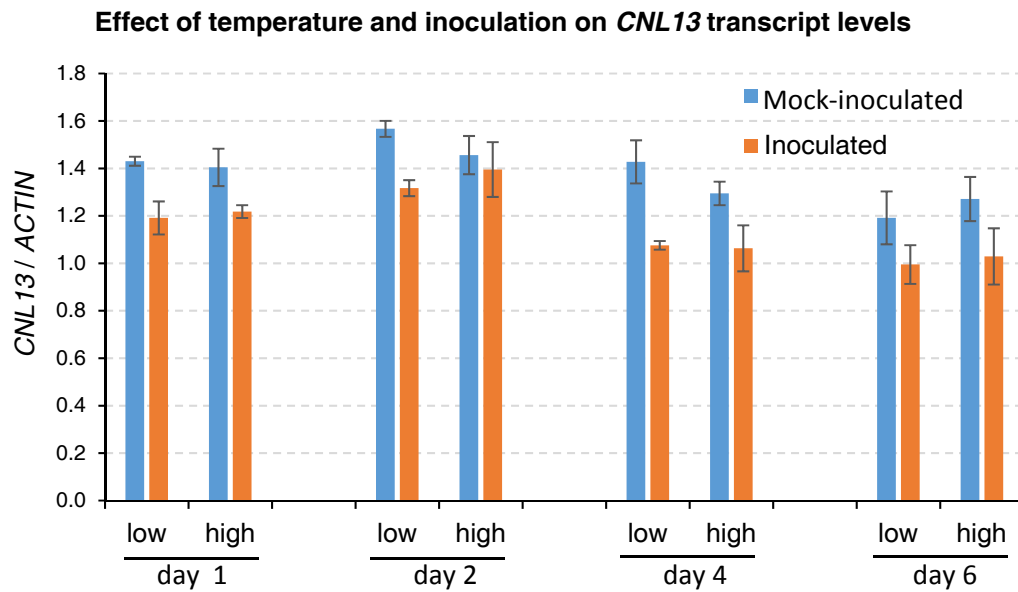

**Figure S8. Transcript Levels of Pathogenesis-Related (PR) Genes in LMPG.** Transcript levels of PR genes *PR1*, *PR2*, *PR3*, *PR4*, *PR5*, and *PR9*. Interaction graphs between genotype (susceptible common wheat LMPG vs. resistant isogenic lines LMPG-*Sr13*) and inoculation (TTKSK vs. mock). Transcript levels relative to the *ACTIN* endogenous control were calculated using the  $\Delta CT$  method. Error bars indicate standard errors of the means. All interaction were highly significant ( $P < 0.001$ ).  $n = 6$ . Samples were collected five days post inoculation. Statistical analyses are presented in *SI Appendix*, Table S6.

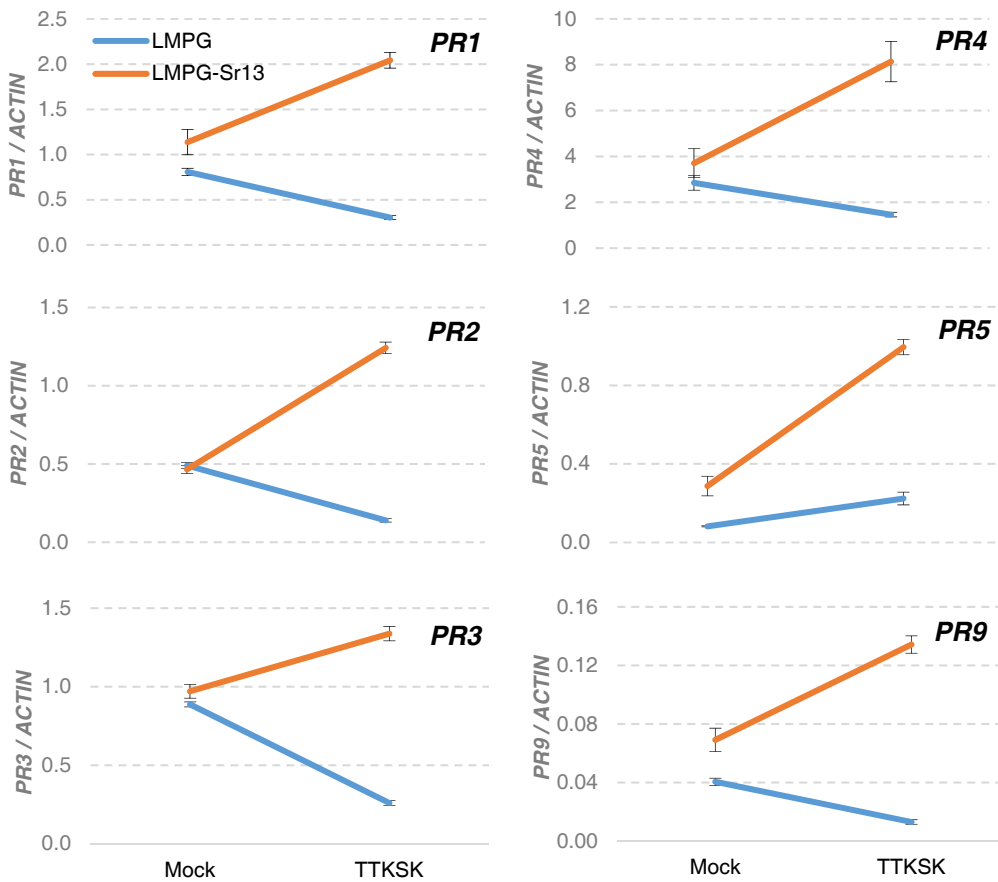

**Figure S9. Transcript Levels of PR Genes in Transgenic Fielder Plants.** Transcript levels of PR genes *PR1*, *PR2*, *PR3*, *PR4*, *PR5*, and *PR9*. Interaction graphs between genotype (susceptible common wheat Fielder vs. transgenic line T<sub>1</sub>Sr13-2) and inoculation (TTKSK vs. mock). Transcript levels relative to the *ACTIN* endogenous control calculated using the  $\Delta$ CT method. Error bars indicate standard errors of the means. All interaction were highly significant ( $P < 0.001$ ). n = 6. Samples were collected five days post inoculation. Statistical analyses are presented in *SI Appendix*, Table S6.

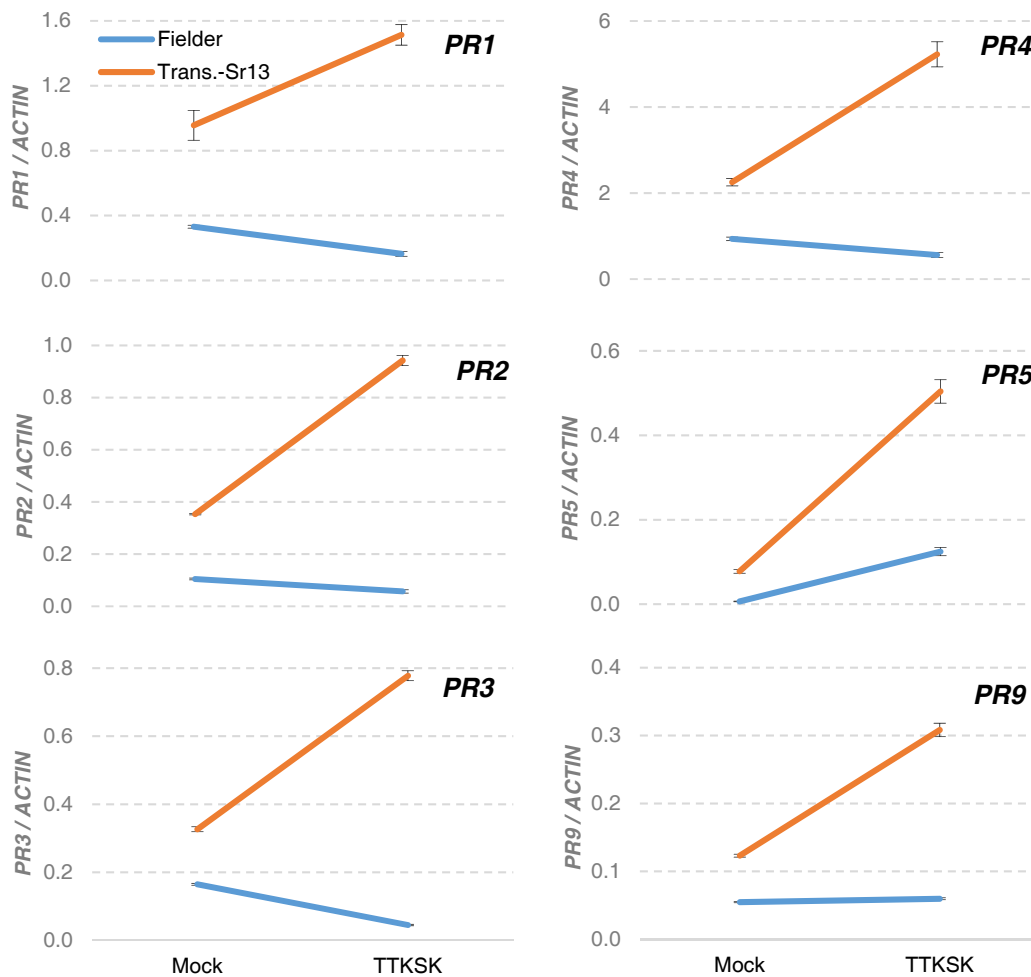

**Figure S10. Induction of Pathogenesis Related Genes in Kronos.** *PR1*, *PR2*, *PR3*, *PR4*, *PR5*, and *PR9* transcript levels relative to *ACTIN* in samples collected 4 and 6 days post inoculation (dpi) with TTKSK or mock inoculation. Kronos plants were grown at low (18 C° day / 15 C° night) and high (25 C° day / 22 C° night) temperatures. Values were calculated using the  $\Delta C_T$  method using *ACTIN* as endogenous control. Error bars indicate standard errors of the means. All interaction were highly significant ( $P < 0.001$ ). n = 3.

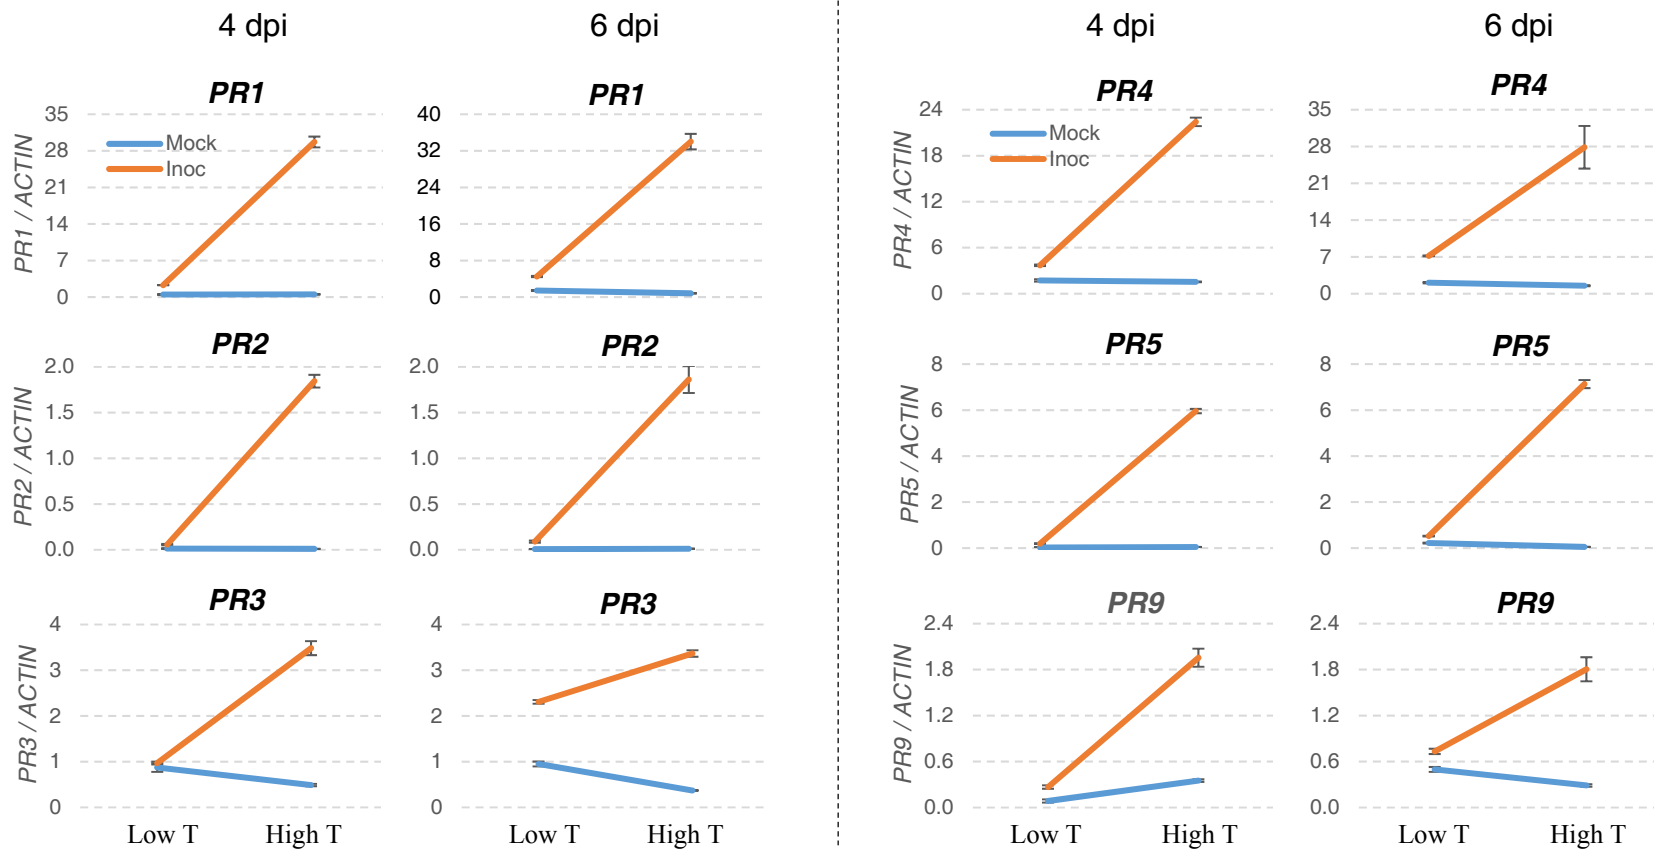





**Figure S12. Differential Responses of Resistant Haplotypes R1, R2 and R3 to JRCQC.** (A) *T. turgidum* ssp. *durum* accessions carrying *CNL13* haplotypes R1, R2 and R3 inoculated with *Pgt* race JRCQC. 1) Rusty (S4 haplotype, susceptible control), 2) Medora (R2), 3) D99656 (R2), 4) Kronos (R1), 5) Maier (R1), 6) Renville (R1), 7) Langdon (R3). (B) Two *Sr13* homozygous resistant and two homozygous susceptible  $F_{2:3}$  families from the cross Kofa (R2)  $\times$  UC1113 (S2) inoculated with races TTKSK, TRTTF and JRCQC. 1-2)  $F_3$  plants homozygous for the *CNL13* R2 resistant allele (++), 3-4)  $F_3$  plants homozygous for the *CNL13* S2 susceptible allele (--). Accessions carrying the R2 (*Sr13b*) haplotype were susceptible to JRCQC, whereas those carrying the R1 and R3 (*Sr13a*) haplotypes were resistant.

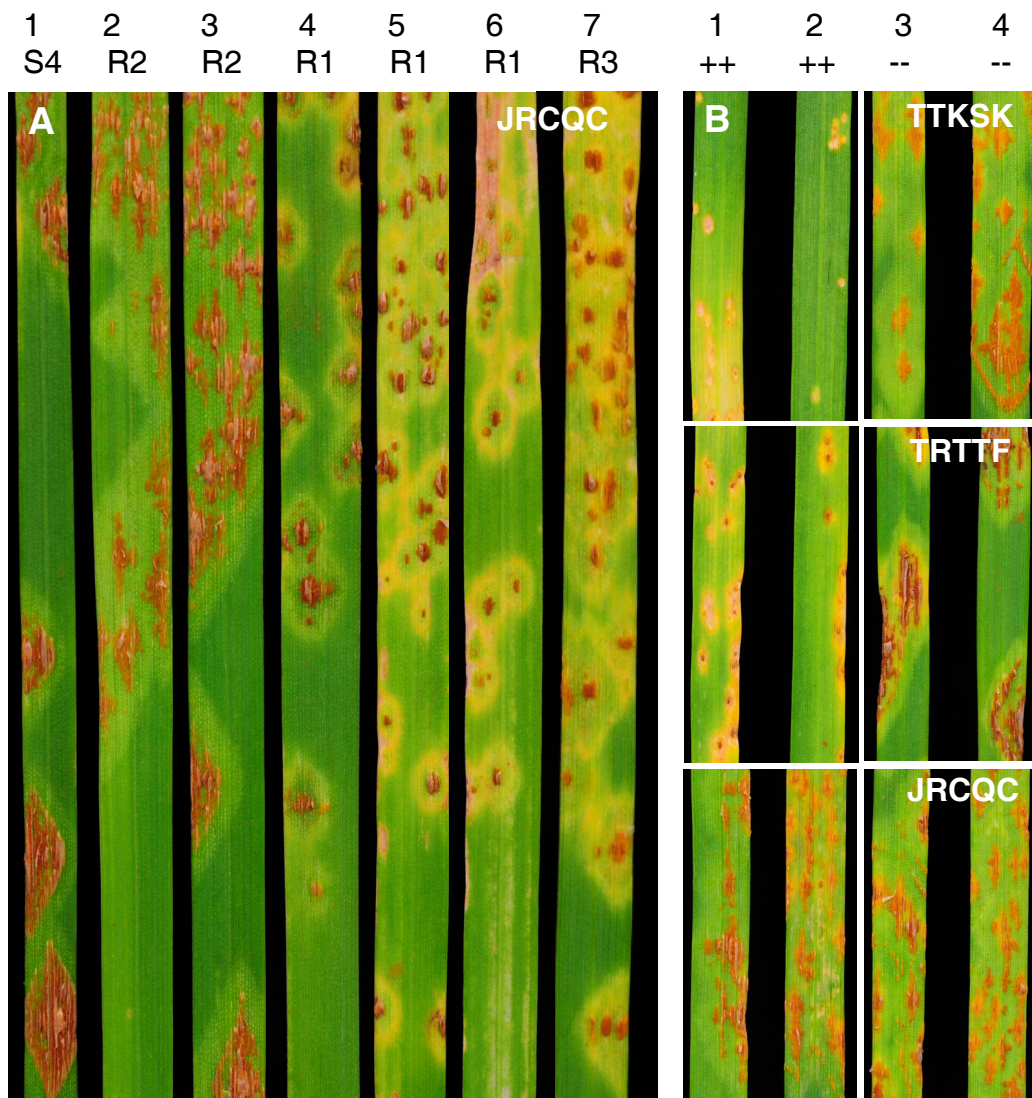

**Figure S13. Geographic Distribution of Accessions Carrying the Different *CNL13* Haplotypes.** Only *T. turgidum* ssp. *dicoccoides* and *T. turgidum* ssp. *dicoccon* accessions with available collection information at GRIN ([www.ars-grin.gov/npgs/searchgrin.html](http://www.ars-grin.gov/npgs/searchgrin.html)) were included in this map. The areas are approximate since many accessions lack precise coordinates. Susceptible haplotype S4 (deletion) is not shown because it was found in all the regions (except Serbia-Italy, S8, *SI Appendix*, Table S9-10).

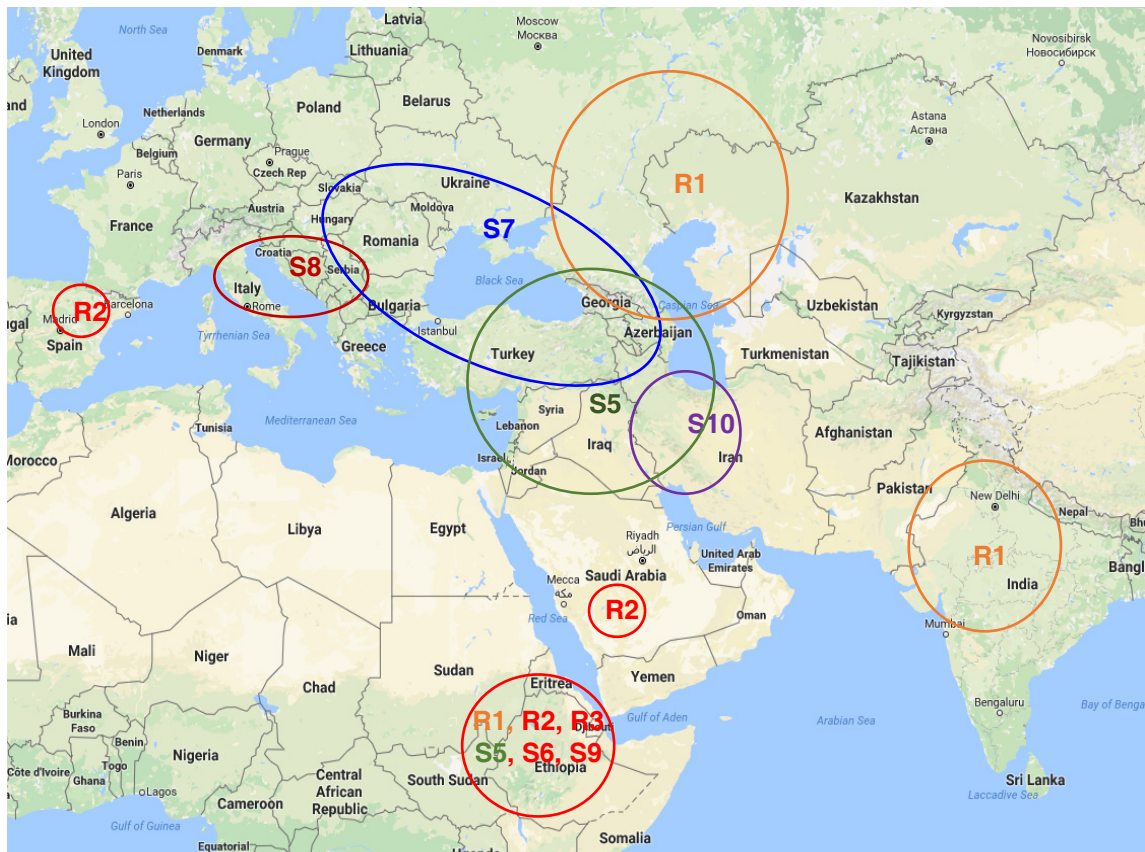





**Figure S15. Phylogenetic Tree of CNL13 Related Proteins.** Neighbor Joining tree including CNL13 (Sr13) protein alleles, linked CNL3 and CNL1 proteins (blue squares), and the closest predicted proteins from *Triticum aestivum* (TRIAE), *T. urartu* (TURARTU), *Secale cereale* (Sc), *Hordeum vulgare* (HORVU), and *Brachypodium distachyon* (Bradi) calculated using MEGA. The tree is based on the MUSCLE alignment of the conserved CC and NBS domains (first 494 amino acids). Numbers on the nodes indicate bootstrap values based on 1000 iterations. Truncated genes are indicated in red. Frame shifts and repetitive element insertions in the truncated genes were removed to maximize similarity of the predicted proteins (superscripts describe the specific changes). Pseudogenes diverge faster than genes and, therefore, their position in the tree can be distorted. It was not possible to determine if the rye or barley 6H contigs were in colinear regions.

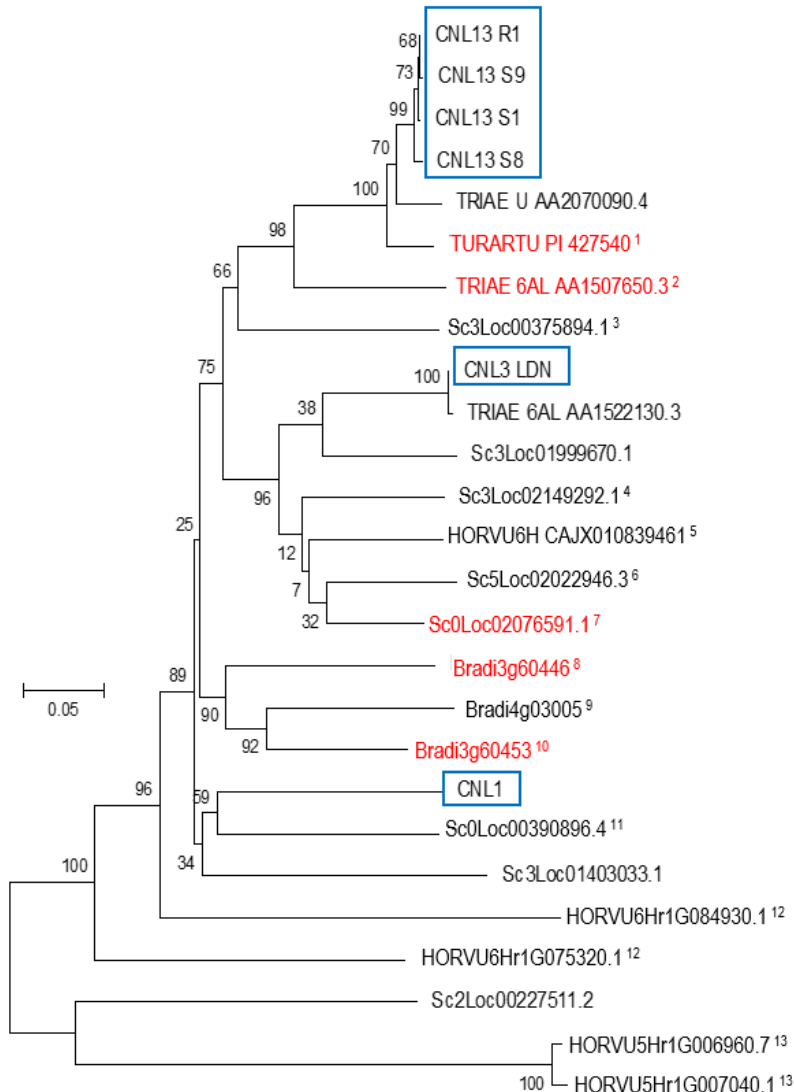

<sup>1</sup> One bp deletion (“C”) at cDNA position 932. For this alignment, a “C” was inserted to restore the original frame and similarity of the predicted protein to CNL13.

<sup>2</sup> Frame shift mutation after amino acid 530 in second exon. Elimination of 2-bp in this region restores similarity in rest of the protein. Different from current annotation.

<sup>3</sup> Only 516 amino acids available. Source rye Lo7\_v2\_contig\_1376058 is 3’ truncated before end of the gene

<sup>4</sup> Only 654 amino acids available. Source rye Lo7\_v2\_contig\_91046 is 3’ truncated before end of the gene.

<sup>5</sup> Barley MLOC\_5371. Bowman\_6HL\_CAJX010839461.

<sup>6</sup> Based on rye DNA contig Lo7\_v2\_contig\_68142. Missing LRR and four last amino acids of the aligned region used for tree. Different start exon 2 from current annotation Sc5Loc02022946.3.

<sup>7</sup> Likely a rye pseudogene. There is no similarity with CNL3 after amino acid 690.

<sup>8</sup> Colinear *Brachypodium* pseudogene due to premature stop codon at amino acid 231. Protein similarity continues after stop codon. Different from current annotation.

<sup>9</sup> Non-colinear *Brachypodium* NLR gene

<sup>10</sup> Colinear *Brachypodium* pseudogene. Repetitive element insertion flanked by duplicated TGTTGACAGAA and frame shift mutation after 292 amino acids were both corrected to restore the ancestral frame.

<sup>11</sup> Lo7\_v2\_contig\_1379036 is 5’ truncated and is missing the first 47 amino acids of the alignment.

<sup>12</sup> Barley chromosome 6H.

<sup>13</sup> Barley non-colinear chromosome 5H (outgroup).

**Figure S16. Effect of the W734R Mutation on the Structure of the CNL13 LRR Domain.**

Phyre 2 (1) prediction of the LRR structure in resistant haplotype R3 (734R, gold) superimposed to the same haplotype with a 734W amino acid (light blue). The changed amino acid is indicated in red. Only the LRR domain from amino acid 590 to 948 was used in the prediction. The C-terminal end of the protein is on the left side of the figure. Note the displacement of the proximal  $\beta$ -sheets in the interior side of the horseshoe fold.

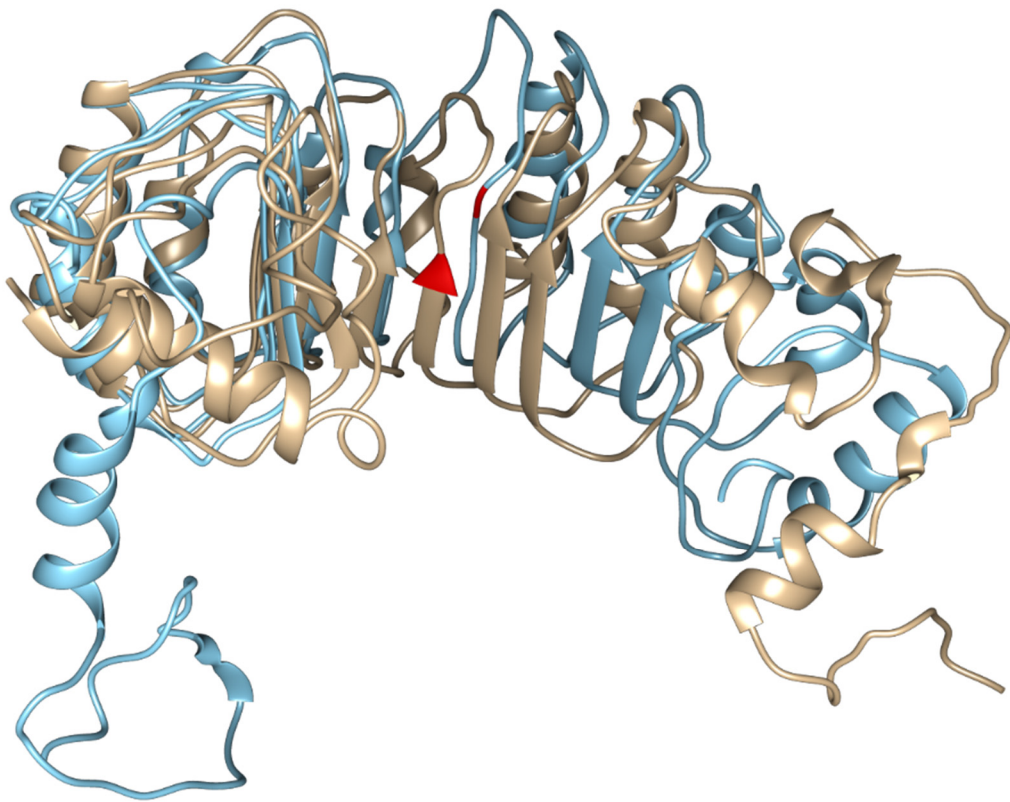



## SI Appendix, Tables

**Table S1.** Primers used for fine mapping, BAC library screening (physical mapping), allelic variation (haplotype), marker-assisted selection (MAS), semi-quantitative PCR, qRT-PCR (*CNL13* and *PR* genes), 5' RACE, production and screening of transgenic lines, copy number assays, and pathogen growth evaluation (fungal / host DNA).

| Marker              | Primer sequence 5'-3' (Forward)  | Primer sequence 5'-3' (Reverse) | Enz.        | Function       |
|---------------------|----------------------------------|---------------------------------|-------------|----------------|
| CJ666008            | CGTCACCATCATTATATCTCTCCACT       | CACAAAGGCTTTTAGGTCTTCCA         | <i>BsrI</i> | Fine map       |
| CJ671993            | TAGGAGCTCTTGAGAGGTTCC            | GCAAATGGACACTGATTACCAC          | <i>PvuI</i> | Fine map       |
| EX24785             | GAAGAATCAAGTCACTGAGGC            | ACAAGGAACTAGAGATCTTGG           |             | Fine map       |
| CJ641478            | AAGCCTACGTCGAGGACGAA             | GAGTGTGAAAATCGCAAAACG           | <i>XhoI</i> | Fine map       |
| CD926040            | GCTCATAACACCAGTCGGTG             | AAACAGTGGTGCCTAATACATG          |             | Fine map       |
| 861TF1/TR1          | CACGACCAGTTTTGGTAGTAAG           | ATCTTCTGGGAACAGACTCAG           |             | Physical map   |
| 449TF2/TR2          | CCTTCTGCATTTCGCATCTACC           | GAGAATTGTACCGTAGGAAACC          |             | Physical map   |
| 468MF3/MR3          | TAAGGAAACATGGTGCCACTG            | CTCGTAGAGTCATCAAATGCAC          |             | Physical map   |
| 1225MF3/MR3         | GTATGCTCACAGACAAGGTTTC           | GTGCTAGTTCTACGTATGTAGG          |             | Physical map   |
| 952MF8/MR8          | TGCTACCTATCTGTCTGTCTG            | GAGACGTATCAGTAACCTATAC          |             | Physical map   |
| 1062TF2/TR2         | GTTGTGTGTGGGAATGATAGG            | CGCATGTTCTTTCAATCTCCC           |             | Physical map   |
| 6ACNL2F1/R1         | GCATAGTGGCTTACTTCCATC            | CTCGGAGTATGTATTCTCAGC           |             | Physical map   |
| 6ACNL13F7/R2        | ACGCTTCGTTTTAACACATCAC           | GTAAGTGTGCCAGTTTGCCAAGATGAC     |             | Haplotype      |
| 6ACNL13F4/R7        | ATATCTTGAGAACCCTCCTTAG           | CGGAGCTGAATAATCTTCTATG          |             | Haplotype      |
| 6ACNL13F3/R3        | GACAGTCTACTGGAAAACCACCATCTTG     | GAGGACAGGATTCGTCTTCGTACAAAC     |             | Haplotype      |
| 6ACNL13F3/R8        | GACAGTCTACTGGAAAACCACCATCTTG     | CATACTCTCTGAAAGAGCAGC           |             | Haplotype      |
| 6ACNL13F5/R6        | CTAGACTTGGCGCAAACCTTCTCTG        | GATGTAACCTTCTATGGGTGAGAAG       |             | Haplotype      |
| RAR1                | TGTATTTGATCTTAAACATTTTTG         | GCTAATCCCTAATCGGTGA             |             | Control marker |
| Sr13F/R             | TTCTTGGCTCAGAAGACACATG           | AAGTCATCATCATATTCCC GC          | <i>HhaI</i> | MAS/ qPCR      |
| Sr13RTF1R1          | GAAGTTGGGTGTCAAGATTATGC          | TATACCTTTTTTCTGCTAGGTAGTCG      |             | Exp. analysis  |
| Sr13RACE5'-out-R1   |                                  | AAACGCTTGTACTCGTCGCCGAGC        |             | 5' RACE        |
| Sr13RACE5'-in-R2    |                                  | GAACAGGAAAGTTTTGCCCAAGTC        |             | 5' RACE        |
| Sr13TransF1R1       | CACCAAGCTTCTTGATCATCCAAGCTGCTG   | GTGCAGCTTCTCAGATTCCTTAGCCG      |             | Transgenic     |
| Sr13TransF2R2       | CACCGTTGAAGGGAAGGGGATTC          | AATGTGCTAGCTTCCATGAAAAGTGGACACG |             | Transgenic     |
| M13-pEntry-F/R      | GTAAAACGACGGCCAG                 | CAGGAAACAGCTATGAC               |             | Transgenic     |
| Hptmiki-F/R         | GGCCTCCAGAAGAAGATGTTGG           | GAGCCTGACCTATTGCATCTCC          |             | Transgenic     |
| SR13TaqmanF1/R1     | CCTTTGTTCTCTAACTATGC             | TATGACAAGTTTTTCGGAGGT           |             | Copy No.       |
| SR13-Probe          | FAM-ATGATGACTTCTTGCTGAATACA-BHQ1 |                                 |             | Copy No.       |
| CO2F1/R1control     | TGCTAACCCTGTGGCATCAC             | GGTACATAGTGTGCTGCATCTG          |             | Copy No.       |
| CO2-Probe control   | CY5-CATGAGCGTGTGCGTGTCTGCG-BHQ3  |                                 |             | Copy No.       |
| PhytochelatinsF1/R1 | GTATGTCCTCCTACCTCACGAAGT         | CGCTGCTGCGATAATCTGCT            |             | Wheat DNA      |
| STD-Actin-F/R       | GGGGGCTTCAGTCAATAGGA             | CCTATCGAACACGGGATTGT            |             | Fungal DNA     |
| PR1-F/R             | CTGGAGCACGAAGCTGCAG              | CGAGTGCTGGAGCTTGCAGT            |             | PR1 (2)        |
| PR2-F/R             | CTCGACATCGGTAACGACCAG            | GCGGCGATGTAAGTTGATGTTTC         |             | PR2 (3)        |
| PR3-F/R             | AGAGATAAGCAAGGCCACGTC            | GGTTGCTCACCAGGTCCTTC            |             | PR3 (4)        |
| PR4-F/R             | CGAGGATCGTGGACCAGTG              | GTGACGAACTGGTAGTTGACG           |             | PR4 (5)        |
| PR5-F/R             | ACAGCTACGCCAAGGACGAC             | CGCGTCTAATCTAAGGGCAG            |             | PR5 (6)        |
| PR9-F/R             | GAGATCCACAGATGCAAACGAG           | GGAGGCCCTTGTCTTCTGAATG          |             | PR9 (7)        |

**Table S2.** Estimated copy number of transgenic insertions in each transgenic event based on T<sub>1</sub> plants and a TaqMan® copy number assay of the transgenic plants relative to Kronos.

| Transgenic Family     | <i>Sr13</i> carrier <sup>1</sup> | <i>Sr13</i> Null <sup>1</sup> | $\chi^2 P$ 1 copy | $\chi^2 P$ 2 copies | $\chi^2 P$ 3 copies | Ratio | TaqMan Tr./Kronos | Copy No. |
|-----------------------|----------------------------------|-------------------------------|-------------------|---------------------|---------------------|-------|-------------------|----------|
| T <sub>1</sub> Sr13-1 | 32                               | 10                            | 0.8586            | <0.0001             | <0.0001             | 3:1   | 0.94 <sup>2</sup> | 1        |
| T <sub>1</sub> Sr13-2 | 80                               | 0                             | <0.0001           | 0.0235              | 0.2995              | 63:1  | 3.33 <sup>3</sup> | 3        |
| T <sub>1</sub> Sr13-3 | 48                               | 14                            | 0.6600            | <0.0001             | <0.0001             | 3:1   | 1.04 <sup>2</sup> | 1        |
| T <sub>1</sub> Sr13-4 | 37                               | 11                            | 0.7389            | <0.0001             | <0.0001             | 3:1   | 1.05 <sup>2</sup> | 1        |

<sup>1</sup> Genotyped with marker 6ACNL13F3/R3 (*SI Appendix*, Table S1) and statistically tested by  $\chi^2$ .

<sup>2</sup> The average copy number values obtained for the transgenic plants were divided by the average (for homozygous plants) or ½ the average copy number value (for heterozygous plants) obtained from Kronos plants (all homozygous *Sr13*), respectively.

<sup>3</sup> For the T<sub>1</sub>Sr13-2 event carrying multiple copies, copy number was estimated by dividing the average of the two highest copy values (expected to be homozygous for the largest number of copies) by the Kronos average copy number value.

**Table S3.** Differences in average pustule size between lines with *Sr13* (tetraploid Kronos and hexaploid LMPG-*Sr13*) and without *Sr13* (tetraploid Rusty and hexaploid LMPG). Plants were grown at two different temperatures (low= 18°C day / 15°C night and high= 25°C day / 22°C night) and samples were collected 13 days post inoculation (dpi) with TTKSK. Data was analyzed using a three-way factorial ANOVA using ploidy level, temperature and presence of *Sr13* as factors. Data was transformed to restore normality of residuals. Leaves from eight different plants were analyzed for each of the eight treatment combinations (except for Rusty low temperature, for which only seven plants were available).

Dependent Variable: Average pustule size (in mm<sup>2</sup>).

| Source          | DF | Sum of Squares | Mean Square | F Value | Pr > F |
|-----------------|----|----------------|-------------|---------|--------|
| Model           | 7  | 2.267          | 0.324       | 79.97   | <.0001 |
| Error           | 55 | 0.223          | 0.004       |         |        |
| Corrected Total | 62 | 2.490          |             |         |        |

R<sup>2</sup>= 0.911

| Source           | DF | Type III SS | Mean Square | F Value | Pr > F |
|------------------|----|-------------|-------------|---------|--------|
| Sr13             | 1  | 1.456       | 1.456       | 359.51  | <.0001 |
| Temp             | 1  | 0.204       | 0.204       | 50.30   | <.0001 |
| Ploidy           | 1  | 0.149       | 0.149       | 36.68   | <.0001 |
| Temp*Ploidy      | 1  | 0.063       | 0.063       | 15.55   | 0.0002 |
| Temp*Sr13        | 1  | 0.279       | 0.279       | 68.97   | <.0001 |
| Ploidy*Sr13      | 1  | 0.101       | 0.101       | 24.97   | <.0001 |
| Temp*Ploidy*Sr13 | 1  | 0.002       | 0.002       | 0.37    | 0.5448 |

| Level of Temp    | Level of Ploidy | Level of Sr13 | N | Mean   | Std Dev |
|------------------|-----------------|---------------|---|--------|---------|
| High temperature | Hexaploid       | No-Sr13       | 8 | 10.657 | 0.971   |
| High temperature | Hexaploid       | Sr13          | 8 | 2.379  | 0.421   |
| High temperature | Tetraploid      | No-Sr13       | 8 | 7.227  | 1.501   |
| High temperature | Tetraploid      | Sr13          | 8 | 1.241  | 0.186   |
| Low temperature  | Hexaploid       | No-Sr13       | 8 | 7.804  | 4.132   |
| Low temperature  | Hexaploid       | Sr13          | 8 | 4.684  | 1.833   |
| Low temperature  | Tetraploid      | No-Sr13       | 7 | 8.627  | 1.482   |
| Low temperature  | Tetraploid      | Sr13          | 8 | 3.137  | 0.999   |

**Table S4.** Differences in fungal growth between lines with and without *Sr13* estimated by fungal DNA relative to host DNA, average *Pgt* infection area (fluorescence), and average sporulation area. Plants were grown at two different temperatures (low= 18°C day / 15°C night and high= 25°C day / 22°C night) and samples were collected five days post inoculation (dpi) with TTKSK for the DNA and fluorescence data and 13 dpi for the sporulation area. Data was transformed to restore normality of residuals and was analyzed using a two-way factorial ANOVA.

|                         |                           | LMPG vs.<br>LMPG- <i>Sr13</i> | Fielder vs.<br><i>Sr13</i> transgenics <sup>1</sup> | Kronos vs.<br><i>sr13</i> -mutants <sup>1</sup> |
|-------------------------|---------------------------|-------------------------------|-----------------------------------------------------|-------------------------------------------------|
| Fungal                  | Replications <sup>2</sup> | n= 6 vs. 6                    | n= 6 vs. 24                                         | n= 6 vs. 8                                      |
| DNA                     | Genotype                  | $P < 0.0001$                  | $P < 0.0001$                                        | $P < 0.0001$                                    |
| relative to             | Temperature               | $P < 0.0001$                  | $P < 0.0001$                                        | $P < 0.0001$                                    |
| host DNA                | Interactions G x T        | $P < 0.0001$                  | $P < 0.0001$                                        | $P < 0.0001$                                    |
| Average                 | Replications <sup>2</sup> | n= 4 vs. 4                    | n= 8 vs. 32                                         | n= 8 vs. 16                                     |
| individual              | Genotype                  | $P < 0.0001$                  | $P < 0.0001$                                        | $P < 0.0001$                                    |
| growth                  | Temperature               | $P < 0.0001$                  | $P < 0.0001$                                        | $P < 0.0001$                                    |
| area (mm <sup>2</sup> ) | Interactions G x T        | $P < 0.0001$                  | $P < 0.0001$                                        | $P < 0.0001$                                    |
| Average                 | Replications <sup>2</sup> | n= 8 vs. 8                    | n= 8 vs. 32                                         | n= 8 vs. 14                                     |
| individual              | Genotype                  | $P < 0.0001$                  | $P < 0.0001$                                        | $P < 0.0001$                                    |
| sporulation             | Temperature               | $P = 0.0220$ <sup>3</sup>     | $P < 0.0001$                                        | $P = 0.7053$ <sup>3</sup>                       |
| area (mm <sup>2</sup> ) | Interactions G x T        | $P < 0.0001$                  | $P < 0.0001$                                        | $P < 0.0001$                                    |

<sup>1</sup> Data from different transgenic events or *sr13*-mutants have been combined.

<sup>2</sup> Number of replications per genotype per temperature. Numbers are in the same order as the lines listed in the title of the respective column.

<sup>3</sup> Differences between temperatures were significant within genotypes (in opposite direction).

**Table S5.** Three-way ANOVA for *CNL13* transcript levels at two different temperatures (low= 18°C day / 15°C night and high= 25°C day / 22°C night), two inoculation treatments (TTKSK and mock), and four collection times post inoculation (1, 2, 4, and 6 dpi). Different plants were used at each collection time. Contrasts between the first two and last two sampling points are presented separately for the inoculated and mock-inoculated samples.

Dependent Variable: Transcript levels of *Sr13*

| Source          | DF | Sum of Squares | Mean Square | F Value | Pr > F |
|-----------------|----|----------------|-------------|---------|--------|
| Model           | 15 | 1.3187         | 0.0879      | 4.86    | <.0001 |
| Error           | 32 | 0.5787         | 0.0181      |         |        |
| Corrected Total | 47 | 1.8974         |             |         |        |
| R-Square        |    |                |             |         |        |
| <b>0.695017</b> |    |                |             |         |        |

| Source     | DF | Type I SS | Mean Square | F Value | Pr > F           |
|------------|----|-----------|-------------|---------|------------------|
| T          | 1  | 0.0008    | 0.0008      | 0.04    | 0.8372           |
| Inoc       | 1  | 0.5797    | 0.5797      | 32.06   | <b>&lt;.0001</b> |
| T*Inoc     | 1  | 0.0188    | 0.0188      | 1.04    | 0.3150           |
| Day        | 3  | 0.6431    | 0.2144      | 11.85   | <b>&lt;.0001</b> |
| T*Day      | 3  | 0.0256    | 0.0085      | 0.47    | 0.7036           |
| Inoc*Day   | 3  | 0.0282    | 0.0094      | 0.52    | 0.6717           |
| T*Inoc*Day | 3  | 0.0225    | 0.0075      | 0.41    | 0.7437           |

| Contrast <b>Mock inoculated</b> | DF | Contrast SS | Mean Square | F Value | Pr > F        |
|---------------------------------|----|-------------|-------------|---------|---------------|
| D1-2 vs. D4-6                   | 1  | 0.1700      | 0.1700      | 9.86    | <b>0.0063</b> |
| <b>% difference 11.5%</b>       |    |             |             |         |               |

| Contrast <b>TTKSK inoculated</b> | DF | Contrast SS | Mean Square | F Value | Pr > F        |
|----------------------------------|----|-------------|-------------|---------|---------------|
| 1-2 vs. 4-6                      | 1  | 0.3449      | 0.3449      | 18.22   | <b>0.0006</b> |
| <b>% difference 18.7%</b>        |    |             |             |         |               |



**Table S6.** Effect of inoculation (TTKSK vs. mock) and genotype (Kronos vs. *sr13*-mutant T4-476, LMPG vs. LMPG-*Sr13*, and Fielder vs. transgenic T<sub>1</sub>Sr13-2) on *PR* transcript levels (5 dpi). Two-way ANOVAs with six replications per genotype-inoculation combination (data was transformed to restore normality of the residuals). Interaction graphs with the corresponding averages and standard errors are presented in Figure 6 and *SI Appendix*, Figs. S8 and S9.

|                              |                 | <i>PR1</i>     | <i>PR2</i>   | <i>PR3</i>     | <i>PR4</i>     | <i>PR5</i>   |
|------------------------------|-----------------|----------------|--------------|----------------|----------------|--------------|
| Kronos                       | Genotype (G)    | $P < 0.0001$   | $P < 0.0001$ | $P < 0.0001$   | $P < 0.0001$   | $P < 0.0001$ |
| vs.                          | Inoculation (I) | $P < 0.0001$   | $P < 0.0001$ | $P < 0.0001$   | $P < 0.0001$   | $P < 0.0001$ |
| mutant- <i>sr13</i>          | G x I           | $P < 0.0001$   | $P < 0.0001$ | $P < 0.0001$   | $P < 0.0001$   | $P < 0.0001$ |
| LMPG- <i>Sr13</i>            | Genotype (G)    | $P < 0.0001$   | $P < 0.0001$ | $P < 0.0001$   | $P < 0.0001$   | $P < 0.0001$ |
| vs.                          | Inoculation (I) | $P = 0.0026^1$ | $P < 0.0001$ | $P = 0.0009^1$ | $P = 0.7515^1$ | $P < 0.0001$ |
| LMPG                         | G x I           | $P < 0.0001$   | $P < 0.0001$ | $P < 0.0001$   | $P < 0.0001$   | $P < 0.0001$ |
| Trans. T <sub>1</sub> Sr13-2 | Genotype (G)    | $P < 0.0001$   | $P < 0.0001$ | $P < 0.0001$   | $P < 0.0001$   | $P < 0.0001$ |
| vs.                          | Inoculation (I) | $P = 0.0053^1$ | $P < 0.0001$ | $P < 0.0001$   | $P = 0.2189^1$ | $P < 0.0001$ |
| Fielder                      | G x I           | $P < 0.0001$   | $P < 0.0001$ | $P < 0.0001$   | $P < 0.0001$   | $P < 0.0001$ |

<sup>1</sup> In the hexaploid genotypes (LMPG and Fielder), several *PR* genes (except *PR5*) showed opposite responses in resistant and susceptible genotypes, resulting in lower *P* values for inoculation. For all *PR* genes, the differences between inoculation treatments were highly significant within each genotype ( $P < 0.001$ , except for Fielder where  $P = 0.0148$ )

**Table S7.** Three-way ANOVA for transcript levels of six *PR* genes in Kronos leaves 4 and 6dpi. Plants were inoculated with TTKSK or were mock-inoculated at high and low temperatures. Data was transformed to normalize the residuals. Interaction graphs with the means and standard errors are presented in *SI Appendix*, Fig. S10.

| Source                | <i>PR1</i> | <i>PR2</i> | <i>PR3</i> | <i>PR4</i> | <i>PR5</i> | <i>PR9</i> |
|-----------------------|------------|------------|------------|------------|------------|------------|
| Day                   | <0.0001    | 0.3693     | <0.0001    | 0.0004     | <0.0001    | <0.0001    |
| Inoculation           | <0.0001    | <0.0001    | <0.0001    | 0.0001     | <0.0001    | <0.0001    |
| Day*Inoculation       | <0.0001    | 0.0013     | <0.0001    | 0.0599     | 0.0010     | 0.4106     |
| Temp.                 | <0.0001    | <0.0001    | <0.0001    | 0.0001     | <0.0001    | <0.0001    |
| Day*Temp.             | <0.0001    | 0.0318     | <0.0001    | 0.0008     | <0.0001    | <0.0001    |
| Inoculation*Temp.     | <0.0001    | <0.0001    | <0.0001    | 0.0001     | <0.0001    | <0.0001    |
| Day*Inoculation*Temp. | 0.1045     | <0.0001    | <0.0001    | 0.3814     | 0.0001     | 0.4218     |

**Table S8.** Distribution of *Sr13* haplotypes in diploid, tetraploid and hexaploid wheat accessions.

| Haplotype | Accession or Name                                                                                                                                                                                                                                                                                                                                                                                                                                                                                                                                                                                                                                                                                                                                                                                                                                                                                                                                                                                                                                                                                                                                                                                                                                                                                                                                                                                                                                                                                                                                                                                                                                                                                                                                                                                                                                                                                                                                                                                                                                                                                                                                                                                                                                                                                                                                                                                                                                                                                                                                                                                                                                                                                                                                                                                                                                                                                                                                                                                                                                                                                                                                                                                                                                                                                                                                                                                                                                                                                                                                                                                                                                                                                                                                                                                                                                                                                                                                                                                                                                                                                                                                                                                                                                                                                                                                                                                                                                                                                                                                                                                   |
|-----------|-----------------------------------------------------------------------------------------------------------------------------------------------------------------------------------------------------------------------------------------------------------------------------------------------------------------------------------------------------------------------------------------------------------------------------------------------------------------------------------------------------------------------------------------------------------------------------------------------------------------------------------------------------------------------------------------------------------------------------------------------------------------------------------------------------------------------------------------------------------------------------------------------------------------------------------------------------------------------------------------------------------------------------------------------------------------------------------------------------------------------------------------------------------------------------------------------------------------------------------------------------------------------------------------------------------------------------------------------------------------------------------------------------------------------------------------------------------------------------------------------------------------------------------------------------------------------------------------------------------------------------------------------------------------------------------------------------------------------------------------------------------------------------------------------------------------------------------------------------------------------------------------------------------------------------------------------------------------------------------------------------------------------------------------------------------------------------------------------------------------------------------------------------------------------------------------------------------------------------------------------------------------------------------------------------------------------------------------------------------------------------------------------------------------------------------------------------------------------------------------------------------------------------------------------------------------------------------------------------------------------------------------------------------------------------------------------------------------------------------------------------------------------------------------------------------------------------------------------------------------------------------------------------------------------------------------------------------------------------------------------------------------------------------------------------------------------------------------------------------------------------------------------------------------------------------------------------------------------------------------------------------------------------------------------------------------------------------------------------------------------------------------------------------------------------------------------------------------------------------------------------------------------------------------------------------------------------------------------------------------------------------------------------------------------------------------------------------------------------------------------------------------------------------------------------------------------------------------------------------------------------------------------------------------------------------------------------------------------------------------------------------------------------------------------------------------------------------------------------------------------------------------------------------------------------------------------------------------------------------------------------------------------------------------------------------------------------------------------------------------------------------------------------------------------------------------------------------------------------------------------------------------------------------------------------------------------------------------------------|
| R1        | Khapli <sup>b</sup> (Citr4013 <sup>b</sup> , PI 101971 <sup>b</sup> , PI 355477 <sup>b</sup> , PI 310471 <sup>b</sup> ), Citr12213 <sup>b</sup> , Citr14919 <sup>b</sup> , PI 41024 <sup>b</sup> , PI 94747 <sup>b</sup> , PI 101971 <sup>b</sup> , PI 154582 <sup>b</sup> , PI 164578 <sup>b</sup> , PI 168673 <sup>b</sup> , PI 193879 <sup>b</sup> , PI 217637 <sup>b</sup> , PI 217639 <sup>b</sup> , PI 217640 <sup>b</sup> , PI 272533 <sup>b</sup> , PI 324076 <sup>b</sup> , PI 355477 <sup>b</sup> , PI 532305 <sup>b</sup> ; Citr15326 <sup>c</sup> , Kronos <sup>c</sup> , Maier <sup>c</sup> , Renville <sup>c</sup> ; Khapstein/9*LMPG <sup>d</sup> , W2691Sr13 <sup>d</sup> , Combination VII <sup>d</sup>                                                                                                                                                                                                                                                                                                                                                                                                                                                                                                                                                                                                                                                                                                                                                                                                                                                                                                                                                                                                                                                                                                                                                                                                                                                                                                                                                                                                                                                                                                                                                                                                                                                                                                                                                                                                                                                                                                                                                                                                                                                                                                                                                                                                                                                                                                                                                                                                                                                                                                                                                                                                                                                                                                                                                                                                                                                                                                                                                                                                                                                                                                                                                                                                                                                                                                                                                                                                                                                                                                                                                                                                                                                                                                                                                                                                                                                                            |
| R2        | PI 58789 <sup>b</sup> , PI 94631 <sup>b</sup> , PI 94664 <sup>b</sup> , PI 194042 <sup>b</sup> , PI 194375 <sup>b</sup> , PI 244341 <sup>b</sup> , PI 254147 <sup>b</sup> , PI 273981 <sup>b</sup> , PI 275996 <sup>b</sup> , PI 480460 <sup>b</sup> ; D98530 <sup>c</sup> , D99656 <sup>c</sup> , Karim <sup>c</sup> , Kofa <sup>c</sup> , Medora <sup>c</sup> , Sceptre <sup>c</sup> , WB881 <sup>c</sup> , Zenit <sup>c</sup> , Cirillo <sup>c</sup> , Ward <sup>c</sup> , Leeds <sup>c</sup>                                                                                                                                                                                                                                                                                                                                                                                                                                                                                                                                                                                                                                                                                                                                                                                                                                                                                                                                                                                                                                                                                                                                                                                                                                                                                                                                                                                                                                                                                                                                                                                                                                                                                                                                                                                                                                                                                                                                                                                                                                                                                                                                                                                                                                                                                                                                                                                                                                                                                                                                                                                                                                                                                                                                                                                                                                                                                                                                                                                                                                                                                                                                                                                                                                                                                                                                                                                                                                                                                                                                                                                                                                                                                                                                                                                                                                                                                                                                                                                                                                                                                                    |
| R3        | PI 352548 <sup>b</sup> ; Altar84 <sup>c</sup> , Langdon <sup>c</sup> , L35 <sup>c</sup> , Aconchi89 <sup>c</sup> , ST 464 <sup>c</sup>                                                                                                                                                                                                                                                                                                                                                                                                                                                                                                                                                                                                                                                                                                                                                                                                                                                                                                                                                                                                                                                                                                                                                                                                                                                                                                                                                                                                                                                                                                                                                                                                                                                                                                                                                                                                                                                                                                                                                                                                                                                                                                                                                                                                                                                                                                                                                                                                                                                                                                                                                                                                                                                                                                                                                                                                                                                                                                                                                                                                                                                                                                                                                                                                                                                                                                                                                                                                                                                                                                                                                                                                                                                                                                                                                                                                                                                                                                                                                                                                                                                                                                                                                                                                                                                                                                                                                                                                                                                              |
| S1        | 2174 <sup>d</sup> , Caledonia <sup>d</sup> , Cayuga <sup>d</sup> , CIMMIT III <sup>d</sup> , Express <sup>d</sup> , Fielder <sup>d</sup> , Finch <sup>d</sup> , GRN*5/ND614-A <sup>d</sup> , Harry <sup>d</sup> , IDO444 <sup>d</sup> , IDO556 <sup>d</sup> , Jaypee <sup>d</sup> , Jupeteco <sup>d</sup> , Louise <sup>d</sup> , Penawawa <sup>d</sup> , Eltan <sup>d</sup> , PI 610750 <sup>d</sup> , Pioneer 26R46 <sup>d</sup> , Platte <sup>d</sup> , Rio Blanco <sup>d</sup> , RS15 <sup>d</sup> , SS550 <sup>d</sup> , TAM105 <sup>d</sup> , Thatcher <sup>d</sup> , USG3209 <sup>d</sup> , Wesley <sup>d</sup>                                                                                                                                                                                                                                                                                                                                                                                                                                                                                                                                                                                                                                                                                                                                                                                                                                                                                                                                                                                                                                                                                                                                                                                                                                                                                                                                                                                                                                                                                                                                                                                                                                                                                                                                                                                                                                                                                                                                                                                                                                                                                                                                                                                                                                                                                                                                                                                                                                                                                                                                                                                                                                                                                                                                                                                                                                                                                                                                                                                                                                                                                                                                                                                                                                                                                                                                                                                                                                                                                                                                                                                                                                                                                                                                                                                                                                                                                                                                                                              |
| S2        | Adamello <sup>c</sup> , Colorado <sup>c</sup> , Dilse <sup>c</sup> , Divide <sup>c</sup> , Duilio <sup>c</sup> , Exeldur <sup>c</sup> , Mexicali75 <sup>c</sup> , Nefer <sup>c</sup> , Saragolla <sup>c</sup> , San Carlo <sup>c</sup> , UC1113 <sup>c</sup> , Valforte <sup>c</sup> , Valnova <sup>c</sup> , Vanavo <sup>c</sup> , Ciccio <sup>c</sup> , Neodur <sup>c</sup> , Latino <sup>c</sup> , Appio <sup>c</sup> , PI 478298 <sup>c</sup> , Vitron <sup>c</sup> , PI 532239 <sup>c</sup>                                                                                                                                                                                                                                                                                                                                                                                                                                                                                                                                                                                                                                                                                                                                                                                                                                                                                                                                                                                                                                                                                                                                                                                                                                                                                                                                                                                                                                                                                                                                                                                                                                                                                                                                                                                                                                                                                                                                                                                                                                                                                                                                                                                                                                                                                                                                                                                                                                                                                                                                                                                                                                                                                                                                                                                                                                                                                                                                                                                                                                                                                                                                                                                                                                                                                                                                                                                                                                                                                                                                                                                                                                                                                                                                                                                                                                                                                                                                                                                                                                                                                                    |
| S3        | LMPG <sup>d</sup>                                                                                                                                                                                                                                                                                                                                                                                                                                                                                                                                                                                                                                                                                                                                                                                                                                                                                                                                                                                                                                                                                                                                                                                                                                                                                                                                                                                                                                                                                                                                                                                                                                                                                                                                                                                                                                                                                                                                                                                                                                                                                                                                                                                                                                                                                                                                                                                                                                                                                                                                                                                                                                                                                                                                                                                                                                                                                                                                                                                                                                                                                                                                                                                                                                                                                                                                                                                                                                                                                                                                                                                                                                                                                                                                                                                                                                                                                                                                                                                                                                                                                                                                                                                                                                                                                                                                                                                                                                                                                                                                                                                   |
| S4        | 05 <sup>a</sup> , 07 <sup>a</sup> , 09 <sup>a</sup> , 10-85 <sup>a</sup> , 11 <sup>a</sup> , 17 <sup>a</sup> , 19 <sup>a</sup> , 20 <sup>a</sup> , 24 <sup>a</sup> , 27 <sup>a</sup> , 28 <sup>a</sup> , 29 <sup>a</sup> , 30 <sup>a</sup> , 32 <sup>a</sup> , 40 <sup>a</sup> , 41 <sup>a</sup> , 42 <sup>a</sup> , 43 <sup>a</sup> , 44 <sup>a</sup> , PI 355455 <sup>a</sup> , PI 355458 <sup>a</sup> , PI 355459 <sup>a</sup> , PI 362036 <sup>a</sup> , PI 428017 <sup>a</sup> , PI 428020 <sup>a</sup> , PI 428036 <sup>a</sup> , PI 428041 <sup>a</sup> , PI 428047 <sup>a</sup> , PI 428055 <sup>a</sup> , PI 428058 <sup>a</sup> , PI 428061 <sup>a</sup> , PI 428086 <sup>a</sup> , PI 470997 <sup>a</sup> , PI 471033 <sup>a</sup> , PI 471815 <sup>a</sup> , PI 487255 <sup>a</sup> , PI 538701 <sup>a</sup> , PI 538718 <sup>a</sup> , PI 560877 <sup>a</sup> , PI 654334 <sup>a</sup> , PI 656872 <sup>a</sup> , PI 428016 <sup>a</sup> , PI 554584 <sup>a</sup> , PI 560697 <sup>a</sup> , PI 560872 <sup>a</sup> , PI 560877 <sup>a</sup> , PI 654311 <sup>a</sup> ; Citr 12214 <sup>b</sup> , Citr 14133 <sup>b</sup> , Citr 14135 <sup>b</sup> , Citr 14621 <sup>b</sup> , Citr 14916 <sup>b</sup> , Citr 14970 <sup>b</sup> , PI 94616 <sup>b</sup> , PI 94621 <sup>b</sup> , PI 94638 <sup>b</sup> , PI 94656 <sup>b</sup> , PI 94657 <sup>b</sup> , PI 193877 <sup>b</sup> , PI 193880 <sup>b</sup> , PI 193882 <sup>b</sup> , PI 193883 <sup>b</sup> , PI 194041 <sup>b</sup> , PI 197259 <sup>b</sup> , PI 197260 <sup>b</sup> , PI 197481 <sup>b</sup> , PI 197485 <sup>b</sup> , PI 197486 <sup>b</sup> , PI 197489 <sup>b</sup> , PI 197492 <sup>b</sup> , PI 197493 <sup>b</sup> , PI 197495 <sup>b</sup> , PI 221400 <sup>b</sup> , PI 254165 <sup>b</sup> , PI 254189 <sup>b</sup> , PI 273978 <sup>b</sup> , PI 276013 <sup>b</sup> , PI 298582 <sup>b</sup> , PI 298586 <sup>b</sup> , PI 319869 <sup>b</sup> , PI 355507 <sup>b</sup> , PI 362696 <sup>b</sup> , PI 377656 <sup>b</sup> , PI 377657 <sup>b</sup> ; Capelli <sup>c</sup> , Colosseo <sup>c</sup> , Durfort <sup>c</sup> , Messapia <sup>c</sup> , Mindum <sup>c</sup> , Produra <sup>c</sup> , Russello SG7 <sup>c</sup> , Rusty <sup>c</sup> , Valbelice <sup>c</sup> , PI 94701 <sup>c</sup> ; Clark's Cream <sup>d</sup> , CO940610 <sup>d</sup> , Foster <sup>d</sup> , Heyne <sup>d</sup> , Jagger <sup>d</sup> , KS01HW163-4 <sup>d</sup> , McCormick <sup>d</sup> , McNeal <sup>d</sup> , NY18/CC 40-1 <sup>d</sup> , OS9 <sup>d</sup> , P91193 <sup>d</sup> , P92201 <sup>d</sup> , Pioneer26R61 <sup>d</sup> , Reeder/Bw-227R <sup>d</sup> , Reeder/Bw-227S <sup>d</sup> , Zak <sup>d</sup> , Chinese Spring <sup>d</sup> , Golden Ball Derivative W3504 <sup>d</sup> ; PI 428183 <sup>c</sup> , PI 428210 <sup>c</sup> , PI 538724 <sup>c</sup> , PI 428231 <sup>c</sup> , PI 428211 <sup>c</sup> , PI 428195 <sup>c</sup> , PI 538728 <sup>c</sup> , PI 503319 <sup>c</sup> , PI 428235 <sup>c</sup> , PI 428193 <sup>c</sup> , PI 428213 <sup>c</sup> , PI 428217 <sup>c</sup> , PI 428212 <sup>c</sup> , PI 428216 <sup>c</sup> , PI 428196 <sup>c</sup> , PI 428203 <sup>c</sup> , PI 428238 <sup>c</sup> , PI 428198 <sup>c</sup> , PI 428187 <sup>c</sup> , PI 538730 <sup>c</sup> , PI 428200 <sup>c</sup> , PI 538725 <sup>c</sup> , PI 428188 <sup>c</sup> , PI 428223 <sup>c</sup> , PI 428240 <sup>c</sup> , PI 428239 <sup>c</sup> , PI 428222 <sup>c</sup> , PI 428277 <sup>c</sup> , PI 428285 <sup>c</sup> , PI 428290 <sup>c</sup> , PI 428228 <sup>c</sup> , PI 428278 <sup>c</sup> , PI 428247 <sup>c</sup> , PI 428279 <sup>c</sup> , PI 428287 <sup>c</sup> , PI 428291 <sup>c</sup> , PI 538733 <sup>c</sup> , PI 428280 <sup>c</sup> , PI 538740 <sup>c</sup> , PI 428292 <sup>c</sup> , PI 428275 <sup>c</sup> , PI 428282 <sup>c</sup> , PI 428288 <sup>c</sup> , PI 428293 <sup>c</sup> , PI 428276 <sup>c</sup> , PI 428283 <sup>c</sup> , PI 428294 <sup>c</sup> , PI 428295 <sup>c</sup> , PI 428304 <sup>c</sup> , PI 428321 <sup>c</sup> , PI 428327 <sup>c</sup> , PI 428296 <sup>c</sup> , PI 428305 <sup>c</sup> , PI 428322 <sup>c</sup> , PI 428298 <sup>c</sup> , PI 428299 <sup>c</sup> , PI 428302 <sup>c</sup> , PI 428303 <sup>c</sup> , PI 428306 <sup>c</sup> , PI 428307 <sup>c</sup> , PI 428308 <sup>c</sup> , PI 538744 <sup>c</sup> , PI 428315 <sup>c</sup> , PI 428319 <sup>c</sup> , PI 538747 <sup>c</sup> , PI 428320 <sup>c</sup> , PI 428323 <sup>c</sup> , PI 428324 <sup>c</sup> , PI 428325 <sup>c</sup> , PI 428336 <sup>c</sup> |
| S5        | 23 <sup>a</sup> , 33 <sup>a</sup> ; Citr7687 <sup>b</sup> , Citr14637 <sup>b</sup> , PI 94623 <sup>b</sup> , PI 225332 <sup>b</sup> , PI 254164 <sup>b</sup> ; Ofanto <sup>c</sup> , Appulo <sup>c</sup> , Trinakria <sup>c</sup>                                                                                                                                                                                                                                                                                                                                                                                                                                                                                                                                                                                                                                                                                                                                                                                                                                                                                                                                                                                                                                                                                                                                                                                                                                                                                                                                                                                                                                                                                                                                                                                                                                                                                                                                                                                                                                                                                                                                                                                                                                                                                                                                                                                                                                                                                                                                                                                                                                                                                                                                                                                                                                                                                                                                                                                                                                                                                                                                                                                                                                                                                                                                                                                                                                                                                                                                                                                                                                                                                                                                                                                                                                                                                                                                                                                                                                                                                                                                                                                                                                                                                                                                                                                                                                                                                                                                                                   |
| S6        | PI 168679 <sup>b</sup> , PI 273980 <sup>b</sup>                                                                                                                                                                                                                                                                                                                                                                                                                                                                                                                                                                                                                                                                                                                                                                                                                                                                                                                                                                                                                                                                                                                                                                                                                                                                                                                                                                                                                                                                                                                                                                                                                                                                                                                                                                                                                                                                                                                                                                                                                                                                                                                                                                                                                                                                                                                                                                                                                                                                                                                                                                                                                                                                                                                                                                                                                                                                                                                                                                                                                                                                                                                                                                                                                                                                                                                                                                                                                                                                                                                                                                                                                                                                                                                                                                                                                                                                                                                                                                                                                                                                                                                                                                                                                                                                                                                                                                                                                                                                                                                                                     |
| S7        | PI 74108 <sup>b</sup> , PI 94614 <sup>b</sup> , PI 94615 <sup>b</sup> , PI 94624 <sup>b</sup> , PI 94626 <sup>b</sup> , PI 94635 <sup>b</sup> , PI 94666 <sup>b</sup> , PI 94674 <sup>b</sup> , PI 94675 <sup>b</sup> , PI 94738 <sup>b</sup> , PI 254190 <sup>b</sup> , PI 272531 <sup>b</sup> , PI 349043 <sup>b</sup> , PI 349046 <sup>b</sup>                                                                                                                                                                                                                                                                                                                                                                                                                                                                                                                                                                                                                                                                                                                                                                                                                                                                                                                                                                                                                                                                                                                                                                                                                                                                                                                                                                                                                                                                                                                                                                                                                                                                                                                                                                                                                                                                                                                                                                                                                                                                                                                                                                                                                                                                                                                                                                                                                                                                                                                                                                                                                                                                                                                                                                                                                                                                                                                                                                                                                                                                                                                                                                                                                                                                                                                                                                                                                                                                                                                                                                                                                                                                                                                                                                                                                                                                                                                                                                                                                                                                                                                                                                                                                                                   |
| S8        | PI 94648 <sup>b</sup> , PI 377655 <sup>b</sup>                                                                                                                                                                                                                                                                                                                                                                                                                                                                                                                                                                                                                                                                                                                                                                                                                                                                                                                                                                                                                                                                                                                                                                                                                                                                                                                                                                                                                                                                                                                                                                                                                                                                                                                                                                                                                                                                                                                                                                                                                                                                                                                                                                                                                                                                                                                                                                                                                                                                                                                                                                                                                                                                                                                                                                                                                                                                                                                                                                                                                                                                                                                                                                                                                                                                                                                                                                                                                                                                                                                                                                                                                                                                                                                                                                                                                                                                                                                                                                                                                                                                                                                                                                                                                                                                                                                                                                                                                                                                                                                                                      |
| S9        | PI 384332 <sup>b</sup>                                                                                                                                                                                                                                                                                                                                                                                                                                                                                                                                                                                                                                                                                                                                                                                                                                                                                                                                                                                                                                                                                                                                                                                                                                                                                                                                                                                                                                                                                                                                                                                                                                                                                                                                                                                                                                                                                                                                                                                                                                                                                                                                                                                                                                                                                                                                                                                                                                                                                                                                                                                                                                                                                                                                                                                                                                                                                                                                                                                                                                                                                                                                                                                                                                                                                                                                                                                                                                                                                                                                                                                                                                                                                                                                                                                                                                                                                                                                                                                                                                                                                                                                                                                                                                                                                                                                                                                                                                                                                                                                                                              |
| S10       | PI 352364 <sup>b</sup>                                                                                                                                                                                                                                                                                                                                                                                                                                                                                                                                                                                                                                                                                                                                                                                                                                                                                                                                                                                                                                                                                                                                                                                                                                                                                                                                                                                                                                                                                                                                                                                                                                                                                                                                                                                                                                                                                                                                                                                                                                                                                                                                                                                                                                                                                                                                                                                                                                                                                                                                                                                                                                                                                                                                                                                                                                                                                                                                                                                                                                                                                                                                                                                                                                                                                                                                                                                                                                                                                                                                                                                                                                                                                                                                                                                                                                                                                                                                                                                                                                                                                                                                                                                                                                                                                                                                                                                                                                                                                                                                                                              |

<sup>a</sup>*T. turgidum* subsp. *dicoccoides*, <sup>b</sup>*T. turgidum* subsp. *dicoccon*, <sup>c</sup>*T. turgidum* subsp. *durum*, <sup>d</sup>*T. aestivum*, <sup>e</sup>*T. urartu*. PI and Citr numbers correspond to Germplasm Resources Information Network (GRIN) numbers. Other numbers correspond to 'Location-Genotype' identification numbers from the University of Haifa wheat germplasm collection (8)

**Table S9.** PCR amplification results for 182 accessions classified as haplotype S4 (*SI Appendix*, Table S8) with five additional pairs of primers.

| Hapl. | <i>Triticum</i> | <i>Triticum</i> | <i>T. turgidum</i> ssp. |                 |              | Total | Amplified Region <sup>1</sup> | % id. R1          | bp   |
|-------|-----------------|-----------------|-------------------------|-----------------|--------------|-------|-------------------------------|-------------------|------|
|       | <i>urartu</i>   | <i>aestivum</i> | <i>dicoccoides</i>      | <i>dicoccum</i> | <i>durum</i> |       |                               |                   |      |
| S4a   | 67              | 15              | 21                      | 9               | 9            | 121   | None                          | -                 | 0    |
| S4b   | 3               | 0               | 0                       | 1               | 0            | 4     | Intron 1                      | 100               | 575  |
| S4c   | 0               | 0               | 1                       | 0               | 0            | 1     | Intron 1                      | 97.9              | 575  |
| S4d   | 0               | 2               | 2                       | 1               | 1            | 6     | Exon 1                        | 95.7              | 833  |
| S4e   | 0               | 0               | 1                       | 0               | 0            | 1     | Exon 1                        | 96.2 <sup>2</sup> | 834  |
| S4f   | 0               | 0               | 0                       | 1               | 0            | 1     | Exon 1                        | 97.0              | 833  |
| S4g   | 0               | 0               | 2                       | 0               | 0            | 2     | Exon 1                        | 97.1              | 833  |
| S4h   | 0               | 0               | 2                       | 0               | 0            | 2     | Exon 1                        | 99.2              | 833  |
| S4i   | 0               | 0               | 4                       | 1               | 0            | 5     | Exon 1                        | 99.3              | 833  |
| S4j   | 0               | 1               | 0                       | 0               | 0            | 1     | Exon 1                        | 99.5              | 833  |
| S4k   | 0               | 0               | 0                       | 1               | 0            | 1     | Exon 1                        | 100               | 833  |
| S4l   | 0               | 0               | 3                       | 0               | 0            | 3     | Exon 1+Intron 1 <sup>3</sup>  | 97.3              | 1457 |
| S4n   | 0               | 0               | 1                       | 0               | 0            | 1     | Exon 1+Intron 1 <sup>3</sup>  | 98.9              | 1458 |
| S4o   | 0               | 0               | 7                       | 1               | 0            | 8     | Exon 1+Intron 1 <sup>3</sup>  | 98.9              | 1458 |
| S4p   | 0               | 0               | 1                       | 0               | 0            | 1     | Exon 1+Intron 1 <sup>3</sup>  | 99.2              | 1456 |
| S4q   | 0               | 0               | 1                       | 0               | 0            | 1     | Exon 1+Intron 1 <sup>3</sup>  | 99.1              | 1456 |
| S4t   | 0               | 0               | 1                       | 1               | 0            | 2     | 3 regions                     | 95.1 <sup>4</sup> | 2519 |
| S4u   | 0               | 0               | 0                       | 1               | 0            | 1     | 3 regions                     | 98.4 <sup>5</sup> | 2519 |
| S4v   | 0               | 0               | 0                       | 20              | 0            | 20    | 3 regions                     | 98.2 <sup>6</sup> | 3595 |

<sup>1</sup> Exon 1 region amplified with primers F<sub>5</sub>-R<sub>6</sub>, intron 1 amplified with primers F<sub>4</sub>-R<sub>7</sub>, first part Exon 2 amplified with primers F<sub>7</sub>-R<sub>2</sub> and last part of Exon 2 and Exon 3 with primers F<sub>3</sub> and R<sub>3</sub>/R<sub>8</sub> (Fig. 2A).

<sup>2</sup> Truncated gene with frame shift mutation.

<sup>3</sup> Intron 1 in these sequences (and in haplotypes S1 and S8) includes a 48 bp insertion flanked by AGTA direct repeats

<sup>4</sup> Truncated gene with frame shift mutations in Exon 2.

<sup>4-5</sup> For these accessions we amplified exon1, intron 1 and the first part of exon 2 (primers F<sub>7</sub>-R<sub>2</sub>). The end of exon 2 and exon 3 was not amplified with two different primer combinations F<sub>3</sub> - R<sub>3</sub> and F<sub>3</sub> -R<sub>8</sub>.

<sup>6</sup> For these accessions we amplified exon1, intron 1, the first part of exon 2 (primers F<sub>7</sub>-R<sub>2</sub>) and the end of the gene (primers F<sub>3</sub> -R<sub>8</sub>). This is a truncated gene with a premature stop codon at the end of exon 2 and frame shift mutations in exon 3.

**Table S10.** Geographic distribution of the different haplotypes in *T. turgidum* subsp. *dicoccooides*, and *T. turgidum* subsp. *dicoccon*. Countries in gray letters in parenthesis represent likely secondary distribution locations.

| <b>Haplotype</b>                                     | <b>Geographic distribution</b>                                                                                                     |
|------------------------------------------------------|------------------------------------------------------------------------------------------------------------------------------------|
| <b><i>T. turgidum</i> subsp. <i>dicoccooides</i></b> |                                                                                                                                    |
| S4                                                   | Israel (22), Turkey (17), Lebanon (3), Armenia (1), Iran (1), Syria (1), Romania (1), Russia (1)                                   |
| S5                                                   | Israel (2)                                                                                                                         |
| <b><i>T. turgidum</i> subsp. <i>dicoccon</i></b>     |                                                                                                                                    |
| R1                                                   | India (8), Ethiopia (1), Georgia (1), Russia (1), Hungary (1), (Taiwan, USA, Canada, Venezuela)                                    |
| R2                                                   | Ethiopia (8), Spain (1), Saudi Arabia (1)                                                                                          |
| R3                                                   | Ethiopia (1)                                                                                                                       |
| S1                                                   | (Only in <i>T. aestivum</i> )                                                                                                      |
| S2                                                   | (Only in <i>T. turgidum</i> subsp. <i>durum</i> )                                                                                  |
| S3                                                   | (Only in <i>T. aestivum</i> )                                                                                                      |
| S4                                                   | Ethiopia (20), Serbia (5), India (1), Iran (2), Russia (1), Turkey (2), Armenia (1), Georgia (1), Montenegro (1), Spain (1), (USA) |
| S5                                                   | Iran (3), Ethiopia (1), Russia (1)                                                                                                 |
| S6                                                   | Ethiopia (2)                                                                                                                       |
| S7                                                   | Georgia (5), Ukraine (2), Russia (3), Iran (2), Turkey (1), Hungary (1)                                                            |
| S8                                                   | Serbia (1), Italy (1)                                                                                                              |
| S9                                                   | Ethiopia (1)                                                                                                                       |
| S10                                                  | Iran (1)                                                                                                                           |

**Table S11.** Z-test for positive selection (Ka/Ks) as implemented in MEGA 6. Lower diagonal matrix: probabilities of positive selection based on Z-test. Highlighted =  $P < 0.05$ , Highlighted and bold =  $P < 0.01$ . Upper diagonal matrix in blue: Ka/Ks values (9). Ka = non-synonymous changes per non-synonymous sites, Ks = synonymous change per synonymous sites, Inf = infinite (Ks=0).

|     | R1    | R2    | R3    | S1    | S2    | S3    | S5    | S6    | S7    | S8    | S9    | S10  |
|-----|-------|-------|-------|-------|-------|-------|-------|-------|-------|-------|-------|------|
| R1  |       | Inf.  | 3.91  | 2.11  | Inf. |
| R2  | 0.021 |       | Inf.  | 3.61  | 1.81  | Inf. |
| R3  | 0.021 | 0.040 |       | Inf.  | 2.71  | Inf.  | Inf.  | Inf.  | 2.11  | 3.61  | 1.81  | Inf. |
| S1  | 0.007 | 0.012 | 0.012 |       | Inf.  | Inf.  | Inf.  | Inf.  | Inf.  | 2.40  | 1.81  | Inf. |
| S2  | 0.004 | 0.007 | 0.094 | 0.007 |       | Inf.  | Inf.  | 2.11  | 4.53  | 3.30  | 2.11  | 3.31 |
| S3  | 0.004 | 0.007 | 0.007 | 0.007 | 0.012 |       | Inf.  | Inf.  | Inf.  | 3.30  | 2.11  | Inf. |
| S5  | 0.012 | 0.021 | 0.021 | 0.021 | 0.040 | 0.040 |       | Inf.  | Inf.  | 2.70  | 1.50  | Inf. |
| S6  | 0.004 | 0.007 | 0.021 | 0.007 | 0.137 | 0.012 | 0.040 |       | 1.81  | 3.30  | 2.11  | Inf. |
| S7  | 0.000 | 0.001 | 0.098 | 0.007 | 0.028 | 0.001 | 0.004 | 0.131 |       | 3.31  | 3.32  | 0.60 |
| S8  | 0.013 | 0.019 | 0.019 | 0.074 | 0.027 | 0.027 | 0.054 | 0.027 | 0.027 |       | 1.62  | 2.70 |
| S9  | 0.099 | 0.131 | 0.131 | 0.132 | 0.099 | 0.099 | 0.171 | 0.099 | 0.027 | 0.108 |       | 2.71 |
| S10 | 0.001 | 0.002 | 0.007 | 0.021 | 0.064 | 0.004 | 0.012 | 0.012 | 0.500 | 0.054 | 0.053 |      |

## References *SI Appendix*

1. Kelley LA, Mezulis S, Yates CM, Wass MN, Sternberg MJE (2015) The Phyre2 web portal for protein modeling, prediction and analysis. *Nat Protoc* 10:845-858.
2. Molina A, Görlach J, Volrath S, Ryals J (1999) Wheat genes encoding two types of PR-1 proteins are pathogen inducible, but do not respond to activators of systemic acquired resistance. *Mol Plant Microbe Interaction* 12: 53-8.
3. Ray S, Anderson JM, Urmeev FI, & Goodwin SB (2003) Rapid induction of a protein disulfide isomerase and defense-related genes in wheat in response to the hemibiotrophic fungal pathogen *Mycosphaerella graminicola*. *Plant Mol Biol*, 53: 741-54.
4. Desmond OJ, Edgar CI, Manners JM, Maclean DJ, Kazan K (2005) Methyl jasmonate induced gene expression in wheat delays symptom development by the crown rot pathogen *Fusarium pseudograminearum*. *Physiol Mol Plant Pathol* 67: 171-179.
5. Bertini L, Leonardi L, Caporale C, Caruso C (2003) Pathogen-responsive wheat *PR4* genes are induced by activators of systemic acquired resistance and wounding. *Plant Sci* 164: 1067-1078.
6. Kuwabara C, Arakawa K (2002) Abscisic acid-and cold-induced thaumatin-like protein in winter wheat has an antifungal activity against snow mould, *Microdochium nivale*. *Physiol Plant*, 115: 101-110.
7. Pritsch C, Muehlbauer GJ, Vance CP (2000) Fungal development and induction of defense response genes during early infection of wheat spikes by *Fusarium graminearum*. *Mol Plant Microbe Interac* 13: 159-69.
8. Nevo E, Korol AB, Beiles A, Fahima T (2002) *Evolution of wild emmer and wheat improvement: population genetics, genetic resources, and genome organization of wheat's progenitor, Triticum dicoccoides*. (Springer-Verlag, Berlin) p 364.
9. Nei M, Gojobori T (1986) Simple methods for estimating the numbers of synonymous and nonsynonymous nucleotide substitutions. *Mol Biol Evol* 3:418-426.
